# Supplementary material
Source: publisher site journal article supplement (https://www.spandidos-publications.com/8376/downloadSupplementary)
Supplement: Supplementary file 1 [file downloadSupplementary]

## Sheet: Sheet1
Table SVI. The GO and KEGG enrichment analysis of 118 intersecting genes
Ontology	ID	Description	Gene ratio	Bg Ratio	P-value	Adjusted P-value	q value	Gene ID	Count
BP	GO:0006959	humoral immune response	28/117	258/18870	3.89228e-27	1.019e-23	5.64586e-24	A2M/AZU1/C1QB/C1R/C1S/C3/C4A/C4BPA/C5/C7/CCL2/CFH/CFI/CFP/CLU/CR1/CTSG/DMBT1/ELANE/FCN1/FCN3/FGA/IL6/LTF/PF4/PPBP/S100A12/SERPING1	28
BP	GO:0006956	complement activation	17/117	67/18870	2.30382e-23	3.0157e-20	1.67087e-20	A2M/C1QB/C1R/C1S/C3/C4A/C4BPA/C5/C7/CFH/CFI/CFP/CLU/CR1/FCN1/FCN3/SERPING1	17
BP	GO:0007599	hemostasis	23/117	231/18870	1.77603e-21	1.54988e-18	8.58724e-19	APOH/CD36/CPB2/CTSG/F10/F11/F13A1/F3/F8/FGA/FGG/GATA1/HBB/IL6/NFE2/PF4/SERPINA1/SERPINF2/SERPING1/THBD/TLR4/VTN/VWF	23
BP	GO:0007596	blood coagulation	22/117	224/18870	1.94552e-20	1.27335e-17	7.05509e-18	APOH/CD36/CPB2/CTSG/F10/F11/F13A1/F3/F8/FGA/FGG/GATA1/HBB/IL6/PF4/SERPINA1/SERPINF2/SERPING1/THBD/TLR4/VTN/VWF	22
BP	GO:0050817	coagulation	22/117	229/18870	3.16099e-20	1.65509e-17	9.17019e-18	APOH/CD36/CPB2/CTSG/F10/F11/F13A1/F3/F8/FGA/FGG/GATA1/HBB/IL6/PF4/SERPINA1/SERPINF2/SERPING1/THBD/TLR4/VTN/VWF	22
BP	GO:0042060	wound healing	26/117	423/18870	6.8085e-19	2.97077e-16	1.64599e-16	APOH/CD34/CD36/CPB2/CTSG/F10/F11/F13A1/F3/F8/FGA/FGG/GATA1/HBB/HMOX1/IL6/OCLN/PF4/PPARG/SERPINA1/SERPINF2/SERPING1/THBD/TLR4/VTN/VWF	26
BP	GO:0006958	complement activation, classical pathway	12/117	42/18870	1.71231e-17	6.40404e-15	3.54822e-15	C1QB/C1R/C1S/C3/C4A/C4BPA/C5/C7/CFI/CLU/CR1/SERPING1	12
BP	GO:0050878	regulation of body fluid levels	23/117	365/18870	5.26632e-17	1.7234e-14	9.54866e-15	APOH/CD36/CPB2/CTSG/F10/F11/F13A1/F3/F8/FGA/FGG/GATA1/HBB/IL6/NFE2/PF4/SERPINA1/SERPINF2/SERPING1/THBD/TLR4/VTN/VWF	23
BP	GO:0002455	humoral immune response mediated by circulating immunoglobulin	12/117	55/18870	6.35312e-16	1.84805e-13	1.02393e-13	C1QB/C1R/C1S/C3/C4A/C4BPA/C5/C7/CFI/CLU/CR1/SERPING1	12
BP	GO:0002443	leukocyte mediated immunity	24/117	466/18870	9.77208e-16	2.55833e-13	1.41747e-13	ACE/AGER/AZU1/C1QB/C1R/C1S/C3/C4A/C4BPA/C5/C7/CFI/CLU/CR1/CTSG/ELANE/GATA1/ICAM1/IL6/ITGAM/ITGB2/PTGDS/SERPING1/TLR4	24
BP	GO:0042742	defense response to bacterium	20/117	330/18870	1.47289e-14	3.50548e-12	1.94224e-12	AZU1/CD36/CFP/CLEC4E/CTSG/DMBT1/ELANE/FGA/HAMP/HP/IL6/LTF/MPO/PLA2G2A/PPBP/RNASE1/S100A12/STAB1/TLR2/TLR4	20
BP	GO:0042730	fibrinolysis	9/117	27/18870	4.22723e-14	9.22242e-12	5.10976e-12	APOH/CPB2/F11/FGA/FGG/SERPINF2/SERPING1/THBD/VTN	9
BP	GO:0002526	acute inflammatory response	13/117	107/18870	1.12445e-13	2.26448e-11	1.25465e-11	A2M/C3/CD163/ELANE/F3/F8/HP/IL6/ORM1/ORM2/SERPINA1/SERPINA3/SERPINF2	13
BP	GO:0002274	myeloid leukocyte activation	17/117	241/18870	1.39867e-13	2.61551e-11	1.44915e-11	AGER/AIF1/AZU1/CLU/CSF1/CTSG/GATA1/HAMP/IL6/ITGAM/ITGB2/PLA2G10/PLA2G2A/PTGDS/S100A12/TLR2/TLR4	17
BP	GO:0006953	acute-phase response	10/117	48/18870	3.04583e-13	5.31599e-11	2.94537e-11	A2M/CD163/F8/HP/IL6/ORM1/ORM2/SERPINA1/SERPINA3/SERPINF2	10
BP	GO:0030193	regulation of blood coagulation	11/117	68/18870	3.67206e-13	6.00841e-11	3.32901e-11	APOH/CD36/CPB2/F11/F3/FGA/FGG/SERPINF2/SERPING1/THBD/VTN	11
BP	GO:1900046	regulation of hemostasis	11/117	70/18870	5.12964e-13	7.89965e-11	4.37687e-11	APOH/CD36/CPB2/F11/F3/FGA/FGG/SERPINF2/SERPING1/THBD/VTN	11
BP	GO:0001906	cell killing	16/117	223/18870	5.91453e-13	8.60236e-11	4.76622e-11	AGER/AZU1/C3/C5/C7/CFH/CR1/CTSG/ELANE/HAMP/ICAM1/ITGAM/LTF/PF4/PLA2G2A/S100A12	16
BP	GO:0050818	regulation of coagulation	11/117	73/18870	8.30602e-13	1.14448e-10	6.34111e-11	APOH/CD36/CPB2/F11/F3/FGA/FGG/SERPINF2/SERPING1/THBD/VTN	11
BP	GO:0006909	phagocytosis	16/117	237/18870	1.50847e-12	1.97458e-10	1.09404e-10	AIF1/AZU1/C3/C4A/C4BPA/CCL2/CD36/CFP/ELANE/FCN1/FCN3/ITGAM/ITGB2/MSR1/TLR2/TLR4	16
BP	GO:0002697	regulation of immune effector process	19/117	389/18870	3.29257e-12	4.10473e-10	2.27426e-10	A2M/AGER/C3/C4BPA/CD22/CD36/CFH/CFP/CR1/FCN1/FCN3/GATA1/ICAM1/IL6/ITGAM/ITGB2/RBP4/SERPING1/TLR4	19
BP	GO:0001819	positive regulation of cytokine production	21/117	499/18870	3.63955e-12	4.33107e-10	2.39967e-10	AGER/AIF1/AZU1/C3/C5/CD34/CD36/CLEC4E/CLU/ELANE/F3/FCN1/HMOX1/IL6/LPL/ORM1/ORM2/PF4/SERPINF2/TLR2/TLR4	21
BP	GO:0050900	leukocyte migration	19/117	396/18870	4.49702e-12	5.11878e-10	2.83611e-10	AGER/AIF1/AZU1/C5/CCL2/CD34/CSF1/CTSG/ELANE/HMOX1/ICAM1/IL6/ITGB2/LYVE1/MMP28/PF4/PPBP/S100A12/SELE	19
BP	GO:0030195	negative regulation of blood coagulation	9/117	48/18870	1.35713e-11	1.45763e-09	8.07613e-10	APOH/CPB2/F11/FGA/FGG/SERPINF2/SERPING1/THBD/VTN	9
BP	GO:0010744	positive regulation of macrophage derived foam cell differentiation	7/117	19/18870	1.39193e-11	1.45763e-09	8.07613e-10	CD36/CSF1/LPL/MSR1/PF4/PLA2G10/PLA2G2A	7
BP	GO:0032102	negative regulation of response to external stimulus	20/117	481/18870	1.56675e-11	1.5776e-09	8.74082e-10	A2M/AIF1/APOH/C5/CCL2/CPB2/CR1/ELANE/F11/FGA/FGG/HAMP/LTF/MMP28/PLA2G10/PPARG/SERPINF2/SERPING1/THBD/VTN	20
BP	GO:1900047	negative regulation of hemostasis	9/117	49/18870	1.65392e-11	1.60369e-09	8.8854e-10	APOH/CPB2/F11/FGA/FGG/SERPINF2/SERPING1/THBD/VTN	9
BP	GO:0010743	regulation of macrophage derived foam cell differentiation	8/117	33/18870	2.09095e-11	1.95504e-09	1.08321e-09	CD36/CSF1/LPL/MSR1/PF4/PLA2G10/PLA2G2A/PPARG	8
BP	GO:0050819	negative regulation of coagulation	9/117	52/18870	2.91626e-11	2.63268e-09	1.45866e-09	APOH/CPB2/F11/FGA/FGG/SERPINF2/SERPING1/THBD/VTN	9
BP	GO:0061041	regulation of wound healing	12/117	133/18870	3.71417e-11	3.24123e-09	1.79583e-09	APOH/CD36/CPB2/F11/F3/FGA/FGG/OCLN/SERPINF2/SERPING1/THBD/VTN	12
BP	GO:0032760	positive regulation of tumor necrosis factor production	11/117	106/18870	5.47096e-11	4.62032e-09	2.55993e-09	AGER/AZU1/CD36/CLU/IL6/LPL/ORM1/ORM2/PF4/TLR2/TLR4	11
BP	GO:0006898	receptor-mediated endocytosis	15/117	258/18870	6.62016e-11	5.41612e-09	3.00085e-09	APOC2/ASGR1/C3/CD36/CLEC4M/CLU/ITGAM/ITGB2/LRP2/LYVE1/MRC1/MSR1/SELE/STAB1/VTN	15
BP	GO:0042116	macrophage activation	11/117	110/18870	8.21869e-11	6.32839e-09	3.5063e-09	AGER/AIF1/AZU1/CLU/HAMP/IL6/ITGAM/ITGB2/PLA2G10/TLR2/TLR4	11
BP	GO:1903557	positive regulation of tumor necrosis factor superfamily cytokine production	11/117	110/18870	8.21869e-11	6.32839e-09	3.5063e-09	AGER/AZU1/CD36/CLU/IL6/LPL/ORM1/ORM2/PF4/TLR2/TLR4	11
BP	GO:0031638	zymogen activation	9/117	59/18870	9.60661e-11	7.18574e-09	3.98132e-09	APOH/C1R/CLEC3B/CPB2/F11/FGA/FGG/SERPINF2/THBD	9
BP	GO:0010742	macrophage derived foam cell differentiation	8/117	40/18870	1.11719e-10	8.12449e-09	4.50145e-09	CD36/CSF1/LPL/MSR1/PF4/PLA2G10/PLA2G2A/PPARG	8
BP	GO:0090077	foam cell differentiation	8/117	41/18870	1.3809e-10	9.77083e-09	5.41362e-09	CD36/CSF1/LPL/MSR1/PF4/PLA2G10/PLA2G2A/PPARG	8
BP	GO:0031639	plasminogen activation	7/117	27/18870	2.3548e-10	1.62234e-08	8.98869e-09	APOH/CLEC3B/CPB2/F11/FGA/FGG/SERPINF2	7
BP	GO:0031640	killing of cells of another organism	10/117	92/18870	2.67436e-10	1.75037e-08	9.69806e-09	AZU1/C5/C7/CTSG/ELANE/HAMP/LTF/PF4/PLA2G2A/S100A12	10
BP	GO:0141061	disruption of cell in another organism	10/117	92/18870	2.67436e-10	1.75037e-08	9.69806e-09	AZU1/C5/C7/CTSG/ELANE/HAMP/LTF/PF4/PLA2G2A/S100A12	10
BP	GO:0030194	positive regulation of blood coagulation	7/117	28/18870	3.12373e-10	1.94712e-08	1.07882e-08	APOH/CD36/CPB2/F3/SERPINF2/THBD/VTN	7
BP	GO:1900048	positive regulation of hemostasis	7/117	28/18870	3.12373e-10	1.94712e-08	1.07882e-08	APOH/CD36/CPB2/F3/SERPINF2/THBD/VTN	7
BP	GO:0072378	blood coagulation, fibrin clot formation	6/117	16/18870	3.80038e-10	2.31381e-08	1.28199e-08	APOH/F13A1/F8/FGA/FGG/THBD	6
BP	GO:0032496	response to lipopolysaccharide	16/117	348/18870	4.73031e-10	2.81454e-08	1.55942e-08	ACE/CCL2/CD36/CTSG/ELANE/GATA1/IL6/LTF/MPO/MRC1/PF4/PPBP/SELE/THBD/TLR2/TLR4	16
BP	GO:0050820	positive regulation of coagulation	7/117	30/18870	5.31621e-10	3.09285e-08	1.71362e-08	APOH/CD36/CPB2/F3/SERPINF2/THBD/VTN	7
BP	GO:0141060	disruption of anatomical structure in another organism	10/117	99/18870	5.57271e-10	3.1716e-08	1.75725e-08	AZU1/C5/C7/CTSG/ELANE/HAMP/LTF/PF4/PLA2G2A/S100A12	10
BP	GO:0032722	positive regulation of chemokine production	9/117	72/18870	6.08441e-10	3.38915e-08	1.87779e-08	AGER/AIF1/AZU1/C5/HMOX1/IL6/LPL/TLR2/TLR4	9
BP	GO:0001774	microglial cell activation	8/117	49/18870	6.25483e-10	3.41149e-08	1.89017e-08	AGER/AIF1/AZU1/CLU/IL6/ITGAM/ITGB2/TLR2	8
BP	GO:1903034	regulation of response to wounding	12/117	173/18870	7.99826e-10	4.27335e-08	2.36769e-08	APOH/CD36/CPB2/F11/F3/FGA/FGG/OCLN/SERPINF2/SERPING1/THBD/VTN	12
BP	GO:0006957	complement activation, alternative pathway	6/117	18/18870	8.72139e-10	4.45076e-08	2.46598e-08	C3/C5/C7/CFH/CFP/CR1	6
BP	GO:0051917	regulation of fibrinolysis	6/117	18/18870	8.72139e-10	4.45076e-08	2.46598e-08	APOH/CPB2/F11/SERPINF2/THBD/VTN	6
BP	GO:0061045	negative regulation of wound healing	9/117	75/18870	8.84031e-10	4.45076e-08	2.46598e-08	APOH/CPB2/F11/FGA/FGG/SERPINF2/SERPING1/THBD/VTN	9
BP	GO:0032642	regulation of chemokine production	10/117	104/18870	9.09795e-10	4.49405e-08	2.48997e-08	AGER/AIF1/AZU1/C5/ELANE/HMOX1/IL6/LPL/TLR2/TLR4	10
BP	GO:0032602	chemokine production	10/117	105/18870	1.00038e-09	4.84997e-08	2.68717e-08	AGER/AIF1/AZU1/C5/ELANE/HMOX1/IL6/LPL/TLR2/TLR4	10
BP	GO:0002269	leukocyte activation involved in inflammatory response	8/117	52/18870	1.02774e-09	4.89205e-08	2.71048e-08	AGER/AIF1/AZU1/CLU/IL6/ITGAM/ITGB2/TLR2	8
BP	GO:0002237	response to molecule of bacterial origin	16/117	369/18870	1.10722e-09	5.17628e-08	2.86796e-08	ACE/CCL2/CD36/CTSG/ELANE/GATA1/IL6/LTF/MPO/MRC1/PF4/PPBP/SELE/THBD/TLR2/TLR4	16
BP	GO:0072376	protein activation cascade	6/117	19/18870	1.26824e-09	5.825e-08	3.2274e-08	APOH/F13A1/F8/FGA/FGG/THBD	6
BP	GO:0010883	regulation of lipid storage	8/117	54/18870	1.40642e-09	6.34827e-08	3.51731e-08	C3/CD36/IL6/LPL/MSR1/PLA2G10/PLIN2/PPARG	8
BP	GO:0002444	myeloid leukocyte mediated immunity	10/117	110/18870	1.58474e-09	7.03196e-08	3.89612e-08	ACE/AZU1/C3/CTSG/ELANE/GATA1/IL6/ITGAM/ITGB2/PTGDS	10
BP	GO:0002460	adaptive immune response based on somatic recombination of immune receptors built from immunoglobulin superfamily domains	16/117	380/18870	1.691e-09	7.34631e-08	4.07029e-08	AGER/C1QB/C1R/C1S/C3/C4A/C4BPA/C5/C7/CFI/CLU/CR1/ICAM1/IL6/SERPING1/TLR4	16
BP	GO:0002446	neutrophil mediated immunity	7/117	35/18870	1.71171e-09	7.34631e-08	4.07029e-08	ACE/AZU1/CTSG/ELANE/IL6/ITGAM/ITGB2	7
BP	GO:0032640	tumor necrosis factor production	12/117	186/18870	1.83453e-09	7.6235e-08	4.22387e-08	AGER/AZU1/CD36/CLU/IL6/LPL/LTF/ORM1/ORM2/PF4/TLR2/TLR4	12
BP	GO:0032680	regulation of tumor necrosis factor production	12/117	186/18870	1.83453e-09	7.6235e-08	4.22387e-08	AGER/AZU1/CD36/CLU/IL6/LPL/LTF/ORM1/ORM2/PF4/TLR2/TLR4	12
BP	GO:0061900	glial cell activation	8/117	57/18870	2.19938e-09	8.99683e-08	4.98477e-08	AGER/AIF1/AZU1/CLU/IL6/ITGAM/ITGB2/TLR2	8
BP	GO:0071706	tumor necrosis factor superfamily cytokine production	12/117	191/18870	2.48173e-09	9.84421e-08	5.45427e-08	AGER/AZU1/CD36/CLU/IL6/LPL/LTF/ORM1/ORM2/PF4/TLR2/TLR4	12
BP	GO:1903555	regulation of tumor necrosis factor superfamily cytokine production	12/117	191/18870	2.48173e-09	9.84421e-08	5.45427e-08	AGER/AZU1/CD36/CLU/IL6/LPL/LTF/ORM1/ORM2/PF4/TLR2/TLR4	12
BP	GO:0045807	positive regulation of endocytosis	11/117	155/18870	3.30176e-09	1.29015e-07	7.14819e-08	AZU1/C3/C4A/CCL2/CD36/CFP/CLU/FCN1/FCN3/SELE/VTN	11
BP	GO:0030449	regulation of complement activation	6/117	22/18870	3.4352e-09	1.30795e-07	7.2468e-08	A2M/C3/C4BPA/CFH/CR1/SERPING1	6
BP	GO:0030100	regulation of endocytosis	14/117	291/18870	3.49455e-09	1.30795e-07	7.2468e-08	APOC2/AZU1/C3/C4A/CCL2/CD22/CD36/CFP/CLU/FCN1/FCN3/SELE/TLR2/VTN	14
BP	GO:0097529	myeloid leukocyte migration	13/117	242/18870	3.49719e-09	1.30795e-07	7.2468e-08	AGER/AIF1/AZU1/C5/CCL2/CSF1/CTSG/IL6/ITGB2/MMP28/PF4/PPBP/S100A12	13
BP	GO:0097242	amyloid-beta clearance	7/117	39/18870	3.83596e-09	1.41444e-07	7.83684e-08	C3/CD36/CLU/ITGAM/ITGB2/LRP2/MSR1	7
BP	GO:0032731	positive regulation of interleukin-1 beta production	8/117	62/18870	4.38598e-09	1.57295e-07	8.71505e-08	AGER/AZU1/CD36/IL6/LPL/ORM1/ORM2/TLR4	8
BP	GO:0090303	positive regulation of wound healing	8/117	62/18870	4.38598e-09	1.57295e-07	8.71505e-08	APOH/CD36/CPB2/F3/OCLN/SERPINF2/THBD/VTN	8
BP	GO:0097006	regulation of plasma lipoprotein particle levels	9/117	91/18870	5.07918e-09	1.79693e-07	9.95607e-08	APOC2/CD36/GPIHBP1/HMOX1/LPL/MPO/MSR1/PLA2G10/PLA2G2A	9
BP	GO:0016064	immunoglobulin mediated immune response	12/117	205/18870	5.52893e-09	1.92996e-07	1.06931e-07	C1QB/C1R/C1S/C3/C4A/C4BPA/C5/C7/CFI/CLU/CR1/SERPING1	12
BP	GO:0019724	B cell mediated immunity	12/117	208/18870	6.512e-09	2.24321e-07	1.24287e-07	C1QB/C1R/C1S/C3/C4A/C4BPA/C5/C7/CFI/CLU/CR1/SERPING1	12
BP	GO:0009620	response to fungus	8/117	67/18870	8.24599e-09	2.80364e-07	1.55338e-07	CLEC4E/CTSG/ELANE/HAMP/LTF/MPO/S100A12/TLR4	8
BP	GO:0002449	lymphocyte mediated immunity	15/117	368/18870	8.78905e-09	2.94997e-07	1.63446e-07	AGER/C1QB/C1R/C1S/C3/C4A/C4BPA/C5/C7/CFI/CLU/CR1/ICAM1/IL6/SERPING1	15
BP	GO:1903035	negative regulation of response to wounding	9/117	97/18870	8.97896e-09	2.97556e-07	1.64863e-07	APOH/CPB2/F11/FGA/FGG/SERPINF2/SERPING1/THBD/VTN	9
BP	GO:0030168	platelet activation	10/117	133/18870	1.01233e-08	3.31284e-07	1.83551e-07	CTSG/FGA/FGG/GATA1/HBB/IL6/PF4/THBD/TLR4/VWF	10
BP	GO:0051918	negative regulation of fibrinolysis	5/117	13/18870	1.04004e-08	3.3615e-07	1.86247e-07	APOH/CPB2/SERPINF2/THBD/VTN	5
BP	GO:0050764	regulation of phagocytosis	9/117	100/18870	1.17675e-08	3.757e-07	2.0816e-07	AZU1/C3/C4A/CCL2/CD36/CFP/FCN1/FCN3/TLR2	9
BP	GO:0010884	positive regulation of lipid storage	6/117	27/18870	1.32885e-08	4.19148e-07	2.32233e-07	C3/CD36/LPL/MSR1/PLA2G10/PLIN2	6
BP	GO:0050766	positive regulation of phagocytosis	8/117	72/18870	1.47478e-08	4.59639e-07	2.54667e-07	AZU1/C3/C4A/CCL2/CD36/CFP/FCN1/FCN3	8
BP	GO:0032732	positive regulation of interleukin-1 production	8/117	73/18870	1.64779e-08	5.0752e-07	2.81196e-07	AGER/AZU1/CD36/IL6/LPL/ORM1/ORM2/TLR4	8
BP	GO:1905952	regulation of lipid localization	11/117	183/18870	1.87825e-08	5.71108e-07	3.16427e-07	APOC2/C3/CD36/FABP3/IL6/LPL/MSR1/PLA2G10/PLIN2/PPARG/RETN	11
BP	GO:0001894	tissue homeostasis	13/117	279/18870	1.91969e-08	5.71108e-07	3.16427e-07	AZGP1/CD34/CLDN5/CSF1/GATA1/HAMP/IL6/LTF/OCLN/PIGR/RBP4/SERPINA3/TLR4	13
BP	GO:0060249	anatomical structure homeostasis	13/117	279/18870	1.91969e-08	5.71108e-07	3.16427e-07	AZGP1/CD34/CLDN5/CSF1/GATA1/HAMP/IL6/LTF/OCLN/PIGR/RBP4/SERPINA3/TLR4	13
BP	GO:0002685	regulation of leukocyte migration	12/117	230/18870	2.00427e-08	5.89571e-07	3.26657e-07	AGER/AIF1/C5/CCL2/CSF1/ELANE/HMOX1/ICAM1/IL6/LYVE1/MMP28/SELE	12
BP	GO:1903036	positive regulation of response to wounding	8/117	77/18870	2.5269e-08	7.35046e-07	4.07259e-07	APOH/CD36/CPB2/F3/OCLN/SERPINF2/THBD/VTN	8
BP	GO:1905954	positive regulation of lipid localization	9/117	111/18870	2.9533e-08	8.49641e-07	4.70751e-07	C3/CD36/FABP3/LPL/MSR1/PLA2G10/PLIN2/PPARG/RETN	9
BP	GO:0030595	leukocyte chemotaxis	12/117	240/18870	3.21121e-08	9.11859e-07	5.05224e-07	AIF1/AZU1/C5/CCL2/CSF1/CTSG/IL6/ITGB2/MMP28/PF4/PPBP/S100A12	12
BP	GO:0042744	hydrogen peroxide catabolic process	6/117	31/18870	3.23923e-08	9.11859e-07	5.05224e-07	GPX3/HBA1/HBA2/HBB/HP/MPO	6
BP	GO:0016485	protein processing	12/117	245/18870	4.03102e-08	1.12268e-06	6.22032e-07	ACE/APOH/C1R/CLEC3B/CPB2/CTSG/F11/F3/FGA/FGG/SERPINF2/THBD	12
BP	GO:0150076	neuroinflammatory response	8/117	82/18870	4.17145e-08	1.14956e-06	6.36926e-07	AGER/AIF1/AZU1/CLU/IL6/ITGAM/ITGB2/TLR2	8
BP	GO:0045785	positive regulation of cell adhesion	16/117	482/18870	4.8237e-08	1.31546e-06	7.28843e-07	AGER/AIF1/AZU1/CCL2/CD36/CR1/CSF1/CTSG/ELANE/FGA/FGG/IL6/ITGB2/SELE/SERPINF2/VTN	16
BP	GO:0050832	defense response to fungus	7/117	56/18870	5.30286e-08	1.43122e-06	7.92983e-07	CLEC4E/CTSG/ELANE/HAMP/LTF/MPO/S100A12	7
BP	GO:0002699	positive regulation of immune effector process	12/117	270/18870	1.16626e-07	3.11559e-06	1.72622e-06	C3/CD36/CFP/CR1/FCN1/FCN3/GATA1/IL6/ITGAM/ITGB2/RBP4/TLR4	12
BP	GO:0045056	transcytosis	5/117	20/18870	1.21018e-07	3.20027e-06	1.77314e-06	AGER/FCGRT/GPIHBP1/LRP2/PIGR	5
BP	GO:0019915	lipid storage	8/117	94/18870	1.22486e-07	3.20669e-06	1.7767e-06	C3/CD36/IL6/LPL/MSR1/PLA2G10/PLIN2/PPARG	8
BP	GO:0019730	antimicrobial humoral response	9/117	133/18870	1.41967e-07	3.67991e-06	2.03889e-06	AZU1/CTSG/DMBT1/ELANE/FGA/LTF/PF4/PPBP/S100A12	9
BP	GO:0071222	cellular response to lipopolysaccharide	11/117	226/18870	1.6258e-07	4.17289e-06	2.31203e-06	CCL2/CD36/CTSG/GATA1/IL6/LTF/MRC1/PF4/PPBP/TLR2/TLR4	11
BP	GO:0015909	long-chain fatty acid transport	7/117	67/18870	1.87988e-07	4.77818e-06	2.64739e-06	ACE/CD36/FABP3/PLA2G10/PLA2G2A/PLIN2/PPARG	7
BP	GO:0006935	chemotaxis	15/117	468/18870	2.05961e-07	5.18468e-06	2.87262e-06	AGER/AIF1/AZU1/C5/CCL2/CSF1/CTSG/ELANE/F3/IL6/ITGB2/MMP28/PF4/PPBP/S100A12	15
BP	GO:0042330	taxis	15/117	470/18870	2.1753e-07	5.42374e-06	3.00507e-06	AGER/AIF1/AZU1/C5/CCL2/CSF1/CTSG/ELANE/F3/IL6/ITGB2/MMP28/PF4/PPBP/S100A12	15
BP	GO:1903532	positive regulation of secretion by cell	12/117	288/18870	2.34164e-07	5.78342e-06	3.20435e-06	CPB2/FGA/FGG/GATA1/ITGAM/ITGB2/PLA2G10/PPARG/RBP4/RETN/TLR2/TLR4	12
BP	GO:0071219	cellular response to molecule of bacterial origin	11/117	239/18870	2.85073e-07	6.97497e-06	3.86454e-06	CCL2/CD36/CTSG/GATA1/IL6/LTF/MRC1/PF4/PPBP/TLR2/TLR4	11
BP	GO:0045123	cellular extravasation	7/117	74/18870	3.75355e-07	9.09888e-06	5.04131e-06	AGER/AZU1/CCL2/ELANE/ICAM1/LYVE1/SELE	7
BP	GO:0002920	regulation of humoral immune response	6/117	47/18870	4.35751e-07	1.03778e-05	5.74994e-06	A2M/C3/C4BPA/CFH/CR1/SERPING1	6
BP	GO:0032611	interleukin-1 beta production	8/117	111/18870	4.45186e-07	1.03778e-05	5.74994e-06	AGER/AZU1/CD36/IL6/LPL/ORM1/ORM2/TLR4	8
BP	GO:0032651	regulation of interleukin-1 beta production	8/117	111/18870	4.45186e-07	1.03778e-05	5.74994e-06	AGER/AZU1/CD36/IL6/LPL/ORM1/ORM2/TLR4	8
BP	GO:0001867	complement activation, lectin pathway	4/117	11/18870	4.47936e-07	1.03778e-05	5.74994e-06	A2M/FCN1/FCN3/SERPING1	4
BP	GO:1903027	regulation of opsonization	4/117	11/18870	4.47936e-07	1.03778e-05	5.74994e-06	C4BPA/CFP/FCN1/FCN3	4
BP	GO:0043277	apoptotic cell clearance	6/117	48/18870	4.95496e-07	1.1379e-05	6.30465e-06	C3/C4A/CCL2/CD36/FCN1/FCN3	6
BP	GO:0051047	positive regulation of secretion	12/117	310/18870	5.13995e-07	1.17012e-05	6.48316e-06	CPB2/FGA/FGG/GATA1/ITGAM/ITGB2/PLA2G10/PPARG/RBP4/RETN/TLR2/TLR4	12
BP	GO:0006911	phagocytosis, engulfment	6/117	49/18870	5.61795e-07	1.26791e-05	7.02498e-06	AIF1/C3/CD36/ITGAM/ITGB2/MSR1	6
BP	GO:0015908	fatty acid transport	8/117	116/18870	6.24314e-07	1.39697e-05	7.74003e-06	ACE/CD36/FABP3/PLA2G10/PLA2G2A/PLIN2/PPARG/RBP2	8
BP	GO:0022409	positive regulation of cell-cell adhesion	12/117	322/18870	7.68153e-07	1.70426e-05	9.44259e-06	AGER/AIF1/CCL2/CR1/CTSG/ELANE/FGA/FGG/IL6/ITGB2/SELE/SERPINF2	12
BP	GO:0071216	cellular response to biotic stimulus	11/117	265/18870	7.94181e-07	1.7472e-05	9.68051e-06	CCL2/CD36/CTSG/GATA1/IL6/LTF/MRC1/PF4/PPBP/TLR2/TLR4	11
BP	GO:0006869	lipid transport	14/117	453/18870	8.3449e-07	1.82058e-05	1.00871e-05	ACE/APOC2/APOH/CD36/CLU/FABP3/MSR1/PLA2G10/PLA2G2A/PLIN2/PPARG/RBP2/RBP4/RETN	14
BP	GO:0060326	cell chemotaxis	12/117	325/18870	8.46985e-07	1.83257e-05	1.01535e-05	AIF1/AZU1/C5/CCL2/CSF1/CTSG/IL6/ITGB2/MMP28/PF4/PPBP/S100A12	12
BP	GO:0006910	phagocytosis, recognition	5/117	29/18870	8.86565e-07	1.90248e-05	1.05409e-05	C4BPA/CD36/CFP/FCN1/FCN3	5
BP	GO:0003018	vascular process in circulatory system	11/117	269/18870	9.20181e-07	1.95856e-05	1.08516e-05	ACE/AGER/AZU1/CD36/CLDN5/FGA/FGG/HBB/LRP2/OCLN/SERPINF2	11
BP	GO:0045916	negative regulation of complement activation	4/117	13/18870	9.6126e-07	2.0295e-05	1.12446e-05	A2M/C4BPA/CR1/SERPING1	4
BP	GO:0042743	hydrogen peroxide metabolic process	6/117	54/18870	1.01176e-06	2.11904e-05	1.17407e-05	GPX3/HBA1/HBA2/HBB/HP/MPO	6
BP	GO:0050829	defense response to Gram-negative bacterium	7/117	89/18870	1.3313e-06	2.76614e-05	1.5326e-05	AZU1/CTSG/DMBT1/ELANE/IL6/LTF/TLR4	7
BP	GO:0032612	interleukin-1 production	8/117	130/18870	1.48532e-06	3.03794e-05	1.6832e-05	AGER/AZU1/CD36/IL6/LPL/ORM1/ORM2/TLR4	8
BP	GO:0032652	regulation of interleukin-1 production	8/117	130/18870	1.48532e-06	3.03794e-05	1.6832e-05	AGER/AZU1/CD36/IL6/LPL/ORM1/ORM2/TLR4	8
BP	GO:0099024	plasma membrane invagination	6/117	58/18870	1.55395e-06	3.15367e-05	1.74732e-05	AIF1/C3/CD36/ITGAM/ITGB2/MSR1	6
BP	GO:0034368	protein-lipid complex remodeling	5/117	33/18870	1.73711e-06	3.47157e-05	1.92346e-05	APOC2/LPL/MPO/PLA2G10/PLA2G2A	5
BP	GO:0034369	plasma lipoprotein particle remodeling	5/117	33/18870	1.73711e-06	3.47157e-05	1.92346e-05	APOC2/LPL/MPO/PLA2G10/PLA2G2A	5
BP	GO:0050920	regulation of chemotaxis	10/117	232/18870	1.83843e-06	3.64622e-05	2.02022e-05	AGER/AIF1/AZU1/C5/CCL2/CSF1/ELANE/F3/IL6/MMP28	10
BP	GO:0072593	reactive oxygen species metabolic process	10/117	234/18870	1.98598e-06	3.90924e-05	2.16595e-05	CD36/GPX3/HBA1/HBA2/HBB/HP/ITGAM/ITGB2/MPO/TLR4	10
BP	GO:0007159	leukocyte cell-cell adhesion	13/117	419/18870	2.02551e-06	3.95731e-05	2.19258e-05	AGER/AIF1/CCL2/CLEC4M/CR1/CTSG/ELANE/ICAM1/IL6/ITGB2/OLR1/PLA2G2A/SELE	13
BP	GO:0030185	nitric oxide transport	3/117	5/18870	2.30224e-06	4.46464e-05	2.47367e-05	HBA1/HBA2/HBB	3
BP	GO:0034367	protein-containing complex remodeling	5/117	35/18870	2.35267e-06	4.52627e-05	2.50782e-05	APOC2/LPL/MPO/PLA2G10/PLA2G2A	5
BP	GO:0050727	regulation of inflammatory response	13/117	425/18870	2.3686e-06	4.52627e-05	2.50782e-05	AGER/C3/ELANE/HAMP/IL6/LPL/PLA2G10/PLA2G2A/PPARG/S100A12/SELE/TLR2/TLR4	13
BP	GO:0032757	positive regulation of interleukin-8 production	6/117	63/18870	2.54369e-06	4.82564e-05	2.67369e-05	ELANE/F3/FCN1/IL6/TLR2/TLR4	6
BP	GO:0098869	cellular oxidant detoxification	7/117	99/18870	2.7334e-06	5.14823e-05	2.85242e-05	CD36/GPX3/HBA1/HBA2/HBB/HP/MPO	7
BP	GO:0010324	membrane invagination	6/117	65/18870	3.06127e-06	5.72457e-05	3.17175e-05	AIF1/C3/CD36/ITGAM/ITGB2/MSR1	6
BP	GO:0032755	positive regulation of interleukin-6 production	7/117	101/18870	3.12598e-06	5.74666e-05	3.18399e-05	AGER/AIF1/CD36/IL6/LPL/TLR2/TLR4	7
BP	GO:0002921	negative regulation of humoral immune response	4/117	17/18870	3.13893e-06	5.74666e-05	3.18399e-05	A2M/C4BPA/CR1/SERPING1	4
BP	GO:0008228	opsonization	4/117	17/18870	3.13893e-06	5.74666e-05	3.18399e-05	C4BPA/CFP/FCN1/FCN3	4
BP	GO:0002703	regulation of leukocyte mediated immunity	10/117	249/18870	3.46167e-06	6.2935e-05	3.48697e-05	AGER/C3/C4BPA/CR1/GATA1/ICAM1/IL6/ITGAM/ITGB2/TLR4	10
BP	GO:0071404	cellular response to low-density lipoprotein particle stimulus	5/117	38/18870	3.5841e-06	6.47116e-05	3.5854e-05	CD36/ITGB2/LPL/PPARG/TLR4	5
BP	GO:0055094	response to lipoprotein particle	5/117	39/18870	4.0909e-06	7.3356e-05	4.06436e-05	CD36/ITGB2/LPL/PPARG/TLR4	5
BP	GO:1903969	regulation of response to macrophage colony-stimulating factor	3/117	6/18870	4.58362e-06	8.10806e-05	4.49234e-05	CSF1/TLR2/TLR4	3
BP	GO:1903972	regulation of cellular response to macrophage colony-stimulating factor stimulus	3/117	6/18870	4.58362e-06	8.10806e-05	4.49234e-05	CSF1/TLR2/TLR4	3
BP	GO:0009636	response to toxic substance	10/117	258/18870	4.74334e-06	8.33427e-05	4.61768e-05	CD36/GPX3/HBA1/HBA2/HBB/HP/MPO/MT1E/PON2/TLR2	10
BP	GO:0010885	regulation of cholesterol storage	4/117	19/18870	5.0632e-06	8.80971e-05	4.8811e-05	CD36/LPL/MSR1/PPARG	4
BP	GO:0030198	extracellular matrix organization	11/117	321/18870	5.08123e-06	8.80971e-05	4.8811e-05	CPB2/CTSG/ELANE/ELN/IL6/MMP23B/MMP28/MMP7/QSOX1/SERPINF2/VTN	11
BP	GO:0043062	extracellular structure organization	11/117	322/18870	5.23378e-06	8.90507e-05	4.93393e-05	CPB2/CTSG/ELANE/ELN/IL6/MMP23B/MMP28/MMP7/QSOX1/SERPINF2/VTN	11
BP	GO:0044403	biological process involved in symbiotic interaction	11/117	322/18870	5.23378e-06	8.90507e-05	4.93393e-05	AZU1/CLEC4M/CR1/CTSG/ELANE/FCN1/FCN3/ICAM1/LTF/MRC1/PF4	11
BP	GO:0002691	regulation of cellular extravasation	5/117	41/18870	5.27229e-06	8.90507e-05	4.93393e-05	AGER/ELANE/ICAM1/LYVE1/SELE	5
BP	GO:0048246	macrophage chemotaxis	5/117	41/18870	5.27229e-06	8.90507e-05	4.93393e-05	AZU1/C5/CCL2/CSF1/MMP28	5
BP	GO:0045229	external encapsulating structure organization	11/117	323/18870	5.39032e-06	9.04607e-05	5.01206e-05	CPB2/CTSG/ELANE/ELN/IL6/MMP23B/MMP28/MMP7/QSOX1/SERPINF2/VTN	11
BP	GO:0070527	platelet aggregation	6/117	72/18870	5.58991e-06	9.32127e-05	5.16453e-05	CTSG/FGA/FGG/GATA1/HBB/IL6	6
BP	GO:0071402	cellular response to lipoprotein particle stimulus	5/117	42/18870	5.95526e-06	9.86764e-05	5.46725e-05	CD36/ITGB2/LPL/PPARG/TLR4	5
BP	GO:0098754	detoxification	8/117	158/18870	6.37191e-06	0.000104916	5.81297e-05	CD36/GPX3/HBA1/HBA2/HBB/HP/MPO/MT1E	8
BP	GO:0070374	positive regulation of ERK1 and ERK2 cascade	9/117	218/18870	8.72256e-06	0.000142723	7.90769e-05	AGER/CCL2/CD36/FGA/FGG/ICAM1/PLA2G2A/SERPINF2/TLR4	9
BP	GO:0050830	defense response to Gram-positive bacterium	7/117	118/18870	8.78706e-06	0.000142885	7.91669e-05	CD36/CTSG/DMBT1/IL6/PLA2G2A/RNASE1/TLR2	7
BP	GO:1990748	cellular detoxification	7/117	119/18870	9.28882e-06	0.000150112	8.31709e-05	CD36/GPX3/HBA1/HBA2/HBB/HP/MPO	7
BP	GO:0048660	regulation of smooth muscle cell proliferation	8/117	171/18870	1.13774e-05	0.000182736	0.000101247	AIF1/ELANE/ELN/HMOX1/IL6/PPARG/SERPINF2/TLR4	8
BP	GO:0022407	regulation of cell-cell adhesion	13/117	493/18870	1.17701e-05	0.000187891	0.000104102	AGER/AIF1/CCL2/CR1/CTSG/ELANE/FGA/FGG/IL6/ITGB2/PLA2G2A/SELE/SERPINF2	13
BP	GO:0052548	regulation of endopeptidase activity	10/117	288/18870	1.24314e-05	0.000197246	0.000109286	AGER/CR1/F3/LTF/PPARG/SERPINA1/SERPINA3/SERPINF2/SERPING1/VTN	10
BP	GO:0010886	positive regulation of cholesterol storage	3/117	8/18870	1.27182e-05	0.000198192	0.00010981	CD36/LPL/MSR1	3
BP	GO:0051006	positive regulation of lipoprotein lipase activity	3/117	8/18870	1.27182e-05	0.000198192	0.00010981	APOC2/APOH/GPIHBP1	3
BP	GO:2000427	positive regulation of apoptotic cell clearance	3/117	8/18870	1.27182e-05	0.000198192	0.00010981	C3/C4A/CCL2	3
BP	GO:0045088	regulation of innate immune response	12/117	425/18870	1.32508e-05	0.00020527	0.000113732	A2M/CD36/CFH/CLEC4E/CR1/FCN1/FCN3/LTF/PPARG/SERPING1/TLR2/TLR4	12
BP	GO:0048659	smooth muscle cell proliferation	8/117	175/18870	1.34629e-05	0.000207329	0.000114872	AIF1/ELANE/ELN/HMOX1/IL6/PPARG/SERPINF2/TLR4	8
BP	GO:0071827	plasma lipoprotein particle organization	5/117	50/18870	1.42581e-05	0.00021829	0.000120946	APOC2/LPL/MPO/PLA2G10/PLA2G2A	5
BP	GO:0032635	interleukin-6 production	8/117	177/18870	1.46209e-05	0.000221257	0.000122589	AGER/AIF1/CD36/IL6/LPL/ORM1/TLR2/TLR4	8
BP	GO:0032675	regulation of interleukin-6 production	8/117	177/18870	1.46209e-05	0.000221257	0.000122589	AGER/AIF1/CD36/IL6/LPL/ORM1/TLR2/TLR4	8
BP	GO:0010951	negative regulation of endopeptidase activity	7/117	128/18870	1.49722e-05	0.000223984	0.0001241	CR1/LTF/SERPINA1/SERPINA3/SERPINF2/SERPING1/VTN	7
BP	GO:0097237	cellular response to toxic substance	7/117	128/18870	1.49722e-05	0.000223984	0.0001241	CD36/GPX3/HBA1/HBA2/HBB/HP/MPO	7
BP	GO:0015718	monocarboxylic acid transport	8/117	179/18870	1.58615e-05	0.00023594	0.000130725	ACE/CD36/FABP3/PLA2G10/PLA2G2A/PLIN2/PPARG/RBP2	8
BP	GO:0010878	cholesterol storage	4/117	25/18870	1.60565e-05	0.000237491	0.000131584	CD36/LPL/MSR1/PPARG	4
BP	GO:0007160	cell-matrix adhesion	9/117	239/18870	1.81786e-05	0.000267369	0.000148138	CD34/CD36/CSF1/FGA/FGG/ITGAM/ITGB2/LYVE1/VTN	9
BP	GO:1904996	positive regulation of leukocyte adhesion to vascular endothelial cell	4/117	26/18870	1.88852e-05	0.000272207	0.000150819	ELANE/IL6/ITGB2/SELE	4
BP	GO:0002246	wound healing involved in inflammatory response	3/117	9/18870	1.8991e-05	0.000272207	0.000150819	HMOX1/PPARG/TLR4	3
BP	GO:0061365	positive regulation of triglyceride lipase activity	3/117	9/18870	1.8991e-05	0.000272207	0.000150819	APOC2/APOH/GPIHBP1	3
BP	GO:1903028	positive regulation of opsonization	3/117	9/18870	1.8991e-05	0.000272207	0.000150819	CFP/FCN1/FCN3	3
BP	GO:0071825	protein-lipid complex organization	5/117	53/18870	1.90275e-05	0.000272207	0.000150819	APOC2/LPL/MPO/PLA2G10/PLA2G2A	5
BP	GO:0051091	positive regulation of DNA-binding transcription factor activity	9/117	244/18870	2.14126e-05	0.000304664	0.000168802	AGER/CD36/CLU/IL6/LTF/PPARG/S100A12/TLR2/TLR4	9
BP	GO:0034381	plasma lipoprotein particle clearance	5/117	55/18870	2.28394e-05	0.000323208	0.000179076	APOC2/CD36/GPIHBP1/HMOX1/MSR1	5
BP	GO:0010466	negative regulation of peptidase activity	7/117	137/18870	2.32704e-05	0.000327537	0.000181475	CR1/LTF/SERPINA1/SERPINA3/SERPINF2/SERPING1/VTN	7
BP	GO:0033002	muscle cell proliferation	9/117	247/18870	2.35784e-05	0.000330098	0.000182894	AIF1/ELANE/ELN/HMOX1/IL6/PPARG/RBP4/SERPINF2/TLR4	9
BP	GO:0052547	regulation of peptidase activity	10/117	312/18870	2.47509e-05	0.000344669	0.000190967	AGER/CR1/F3/LTF/PPARG/SERPINA1/SERPINA3/SERPINF2/SERPING1/VTN	10
BP	GO:0051873	killing by host of symbiont cells	4/117	28/18870	2.56182e-05	0.000352991	0.000195578	AZU1/CTSG/ELANE/PF4	4
BP	GO:0090594	inflammatory response to wounding	4/117	28/18870	2.56182e-05	0.000352991	0.000195578	HMOX1/IL6/PPARG/TLR4	4
BP	GO:0070391	response to lipoteichoic acid	3/117	10/18870	2.70072e-05	0.000366346	0.000202977	CD36/TLR2/TLR4	3
BP	GO:0071223	cellular response to lipoteichoic acid	3/117	10/18870	2.70072e-05	0.000366346	0.000202977	CD36/TLR2/TLR4	3
BP	GO:2000425	regulation of apoptotic cell clearance	3/117	10/18870	2.70072e-05	0.000366346	0.000202977	C3/C4A/CCL2	3
BP	GO:0034109	homotypic cell-cell adhesion	6/117	96/18870	2.93953e-05	0.000396685	0.000219787	CTSG/FGA/FGG/GATA1/HBB/IL6	6
BP	GO:0048661	positive regulation of smooth muscle cell proliferation	6/117	98/18870	3.3043e-05	0.000443624	0.000245794	AIF1/ELANE/HMOX1/IL6/SERPINF2/TLR4	6
BP	GO:2001237	negative regulation of extrinsic apoptotic signaling pathway	6/117	99/18870	3.49985e-05	0.00046748	0.000259012	FGA/FGG/GATA1/HMOX1/ICAM1/PF4	6
BP	GO:0070944	neutrophil-mediated killing of bacterium	3/117	11/18870	3.69669e-05	0.00047747	0.000264547	AZU1/CTSG/ELANE	3
BP	GO:0097278	complement-dependent cytotoxicity	3/117	11/18870	3.69669e-05	0.00047747	0.000264547	C3/CFH/CR1	3
BP	GO:1905517	macrophage migration	5/117	61/18870	3.79192e-05	0.00047747	0.000264547	AZU1/C5/CCL2/CSF1/MMP28	5
BP	GO:0001868	regulation of complement activation, lectin pathway	2/117	2/18870	3.81174e-05	0.00047747	0.000264547	A2M/SERPING1	2
BP	GO:0001869	negative regulation of complement activation, lectin pathway	2/117	2/18870	3.81174e-05	0.00047747	0.000264547	A2M/SERPING1	2
BP	GO:0001970	positive regulation of activation of membrane attack complex	2/117	2/18870	3.81174e-05	0.00047747	0.000264547	C3/CR1	2
BP	GO:0034395	regulation of transcription from RNA polymerase II promoter in response to iron	2/117	2/18870	3.81174e-05	0.00047747	0.000264547	HMOX1/SLC40A1	2
BP	GO:0045914	negative regulation of catecholamine metabolic process	2/117	2/18870	3.81174e-05	0.00047747	0.000264547	ITGAM/ITGB2	2
BP	GO:0045963	negative regulation of dopamine metabolic process	2/117	2/18870	3.81174e-05	0.00047747	0.000264547	ITGAM/ITGB2	2
BP	GO:0072377	blood coagulation, common pathway	2/117	2/18870	3.81174e-05	0.00047747	0.000264547	FGA/THBD	2
BP	GO:1903971	positive regulation of response to macrophage colony-stimulating factor	2/117	2/18870	3.81174e-05	0.00047747	0.000264547	TLR2/TLR4	2
BP	GO:1903974	positive regulation of cellular response to macrophage colony-stimulating factor stimulus	2/117	2/18870	3.81174e-05	0.00047747	0.000264547	TLR2/TLR4	2
BP	GO:1904466	positive regulation of matrix metallopeptidase secretion	2/117	2/18870	3.81174e-05	0.00047747	0.000264547	TLR2/TLR4	2
BP	GO:0043410	positive regulation of MAPK cascade	12/117	474/18870	3.87039e-05	0.000481511	0.000266786	AGER/CCL2/CD36/ELANE/FGA/FGG/ICAM1/IL6/PLA2G2A/S100A12/SERPINF2/TLR4	12
BP	GO:1902042	negative regulation of extrinsic apoptotic signaling pathway via death domain receptors	4/117	31/18870	3.88078e-05	0.000481511	0.000266786	FGA/FGG/HMOX1/ICAM1	4
BP	GO:0042542	response to hydrogen peroxide	6/117	101/18870	3.91881e-05	0.000483936	0.000268129	HBA1/HBA2/HBB/HMOX1/HP/IL6	6
BP	GO:0002687	positive regulation of leukocyte migration	7/117	149/18870	3.99098e-05	0.000490535	0.000271785	AGER/AIF1/CSF1/ICAM1/IL6/LYVE1/SELE	7
BP	GO:0051092	positive regulation of NF-kappaB transcription factor activity	7/117	150/18870	4.16511e-05	0.000509544	0.000282318	AGER/CD36/CLU/LTF/S100A12/TLR2/TLR4	7
BP	GO:0000302	response to reactive oxygen species	8/117	205/18870	4.19273e-05	0.000510538	0.000282868	CD36/HBA1/HBA2/HBB/HMOX1/HP/IL6/MPO	8
BP	GO:0031349	positive regulation of defense response	12/117	480/18870	4.37094e-05	0.000528073	0.000292584	C3/CD36/CLEC4E/FCN1/FCN3/IL6/LPL/LTF/PLA2G2A/S100A12/TLR2/TLR4	12
BP	GO:0032677	regulation of interleukin-8 production	6/117	103/18870	4.37708e-05	0.000528073	0.000292584	ELANE/F3/FCN1/IL6/TLR2/TLR4	6
BP	GO:0071674	mononuclear cell migration	8/117	207/18870	4.49122e-05	0.000537619	0.000297873	AGER/AIF1/CCL2/CSF1/CTSG/ICAM1/IL6/S100A12	8
BP	GO:0051090	regulation of DNA-binding transcription factor activity	11/117	406/18870	4.49727e-05	0.000537619	0.000297873	AGER/CD36/CLU/HMOX1/IL6/LTF/PLA2G10/PPARG/S100A12/TLR2/TLR4	11
BP	GO:0050729	positive regulation of inflammatory response	7/117	152/18870	4.5321e-05	0.000539319	0.000298815	C3/IL6/LPL/PLA2G2A/S100A12/TLR2/TLR4	7
BP	GO:0032637	interleukin-8 production	6/117	104/18870	4.62178e-05	0.000547503	0.000303349	ELANE/F3/FCN1/IL6/TLR2/TLR4	6
BP	GO:0031100	animal organ regeneration	5/117	64/18870	4.78842e-05	0.000564689	0.000312871	ACE/CPB2/GATA1/IL6/VTN	5
BP	GO:0042063	gliogenesis	10/117	338/18870	4.87262e-05	0.000572041	0.000316944	AGER/AZU1/CCL2/CLU/CSF1/IL6/LRP2/TLR2/TLR4/VTN	10
BP	GO:0070943	neutrophil-mediated killing of symbiont cell	3/117	12/18870	4.90663e-05	0.000573462	0.000317732	AZU1/CTSG/ELANE	3
BP	GO:2001236	regulation of extrinsic apoptotic signaling pathway	7/117	158/18870	5.79547e-05	0.000674335	0.000373621	FGA/FGG/GATA1/HMOX1/ICAM1/PF4/TLR4	7
BP	GO:0036006	cellular response to macrophage colony-stimulating factor stimulus	3/117	13/18870	6.34978e-05	0.000731228	0.000405144	CSF1/TLR2/TLR4	3
BP	GO:0044406	adhesion of symbiont to host	3/117	13/18870	6.34978e-05	0.000731228	0.000405144	CLEC4M/ICAM1/LTF	3
BP	GO:0045765	regulation of angiogenesis	10/117	349/18870	6.36822e-05	0.000731228	0.000405144	APOH/C3/CD34/CLDN5/F3/HMOX1/IL6/PF4/PPARG/STAB1	10
BP	GO:0070661	leukocyte proliferation	10/117	350/18870	6.52174e-05	0.000745585	0.000413098	ACE/AGER/AIF1/CD22/CLU/CR1/CSF1/IL6/PLA2G2A/TLR4	10
BP	GO:1901342	regulation of vasculature development	10/117	354/18870	7.16772e-05	0.000815874	0.000452042	APOH/C3/CD34/CLDN5/F3/HMOX1/IL6/PF4/PPARG/STAB1	10
BP	GO:1904035	regulation of epithelial cell apoptotic process	6/117	113/18870	7.35552e-05	0.000825629	0.000457447	CCL2/FGA/FGG/HMOX1/ICAM1/IL6	6
BP	GO:0002752	cell surface pattern recognition receptor signaling pathway	5/117	70/18870	7.37957e-05	0.000825629	0.000457447	FCN1/FCN3/LTF/TLR2/TLR4	5
BP	GO:0019731	antibacterial humoral response	5/117	70/18870	7.37957e-05	0.000825629	0.000457447	CTSG/DMBT1/ELANE/FGA/LTF	5
BP	GO:0050922	negative regulation of chemotaxis	5/117	70/18870	7.37957e-05	0.000825629	0.000457447	AIF1/C5/CCL2/ELANE/MMP28	5
BP	GO:0031589	cell-substrate adhesion	10/117	356/18870	7.51063e-05	0.000836716	0.00046359	CD34/CD36/CSF1/FGA/FGG/ITGAM/ITGB2/LYVE1/VTN/VWF	10
BP	GO:0002548	monocyte chemotaxis	5/117	71/18870	7.89962e-05	0.000876322	0.000485534	AIF1/CCL2/CTSG/IL6/S100A12	5
BP	GO:0034116	positive regulation of heterotypic cell-cell adhesion	3/117	14/18870	8.04501e-05	0.000881248	0.000488264	AGER/FGA/FGG	3
BP	GO:0070942	neutrophil mediated cytotoxicity	3/117	14/18870	8.04501e-05	0.000881248	0.000488264	AZU1/CTSG/ELANE	3
BP	GO:0098883	synapse pruning	3/117	14/18870	8.04501e-05	0.000881248	0.000488264	C1QB/C3/ITGAM	3
BP	GO:0045429	positive regulation of nitric oxide biosynthetic process	4/117	38/18870	8.80449e-05	0.000960423	0.000532131	CD36/CLU/HBB/TLR4	4
BP	GO:1904407	positive regulation of nitric oxide metabolic process	4/117	39/18870	9.76396e-05	0.00106067	0.000587672	CD36/CLU/HBB/TLR4	4
BP	GO:0010889	regulation of sequestering of triglyceride	3/117	15/18870	0.000100108	0.00106973	0.000592692	LPL/PLIN2/PPARG	3
BP	GO:0015670	carbon dioxide transport	3/117	15/18870	0.000100108	0.00106973	0.000592692	HBA1/HBA2/HBB	3
BP	GO:0015671	oxygen transport	3/117	15/18870	0.000100108	0.00106973	0.000592692	HBA1/HBA2/HBB	3
BP	GO:1902563	regulation of neutrophil activation	3/117	15/18870	0.000100108	0.00106973	0.000592692	ITGAM/ITGB2/PLA2G2A	3
BP	GO:0071346	cellular response to type II interferon	6/117	120/18870	0.00010267	0.00109264	0.000605388	AIF1/CCL2/MRC1/PPARG/TLR2/TLR4	6
BP	GO:0002366	leukocyte activation involved in immune response	9/117	301/18870	0.000108676	0.00115188	0.000638208	CLEC4E/CR1/GATA1/ICAM1/IL6/ITGAM/ITGB2/PTGDS/TLR4	9
BP	GO:0045861	negative regulation of proteolysis	8/117	235/18870	0.000109146	0.00115219	0.000638383	CPB2/CR1/LTF/SERPINA1/SERPINA3/SERPINF2/SERPING1/VTN	8
BP	GO:0001905	activation of membrane attack complex	2/117	3/18870	0.000113887	0.00116015	0.000642789	C3/CR1	2
BP	GO:0001969	regulation of activation of membrane attack complex	2/117	3/18870	0.000113887	0.00116015	0.000642789	C3/CR1	2
BP	GO:0002414	immunoglobulin transcytosis in epithelial cells	2/117	3/18870	0.000113887	0.00116015	0.000642789	FCGRT/PIGR	2
BP	GO:0034371	chylomicron remodeling	2/117	3/18870	0.000113887	0.00116015	0.000642789	APOC2/LPL	2
BP	GO:0055095	lipoprotein particle mediated signaling	2/117	3/18870	0.000113887	0.00116015	0.000642789	CD36/LPL	2
BP	GO:0055096	low-density lipoprotein particle mediated signaling	2/117	3/18870	0.000113887	0.00116015	0.000642789	CD36/LPL	2
BP	GO:0150064	vertebrate eye-specific patterning	2/117	3/18870	0.000113887	0.00116015	0.000642789	C3/ITGAM	2
BP	GO:2000361	regulation of prostaglandin-E synthase activity	2/117	3/18870	0.000113887	0.00116015	0.000642789	ITGAM/ITGB2	2
BP	GO:2000363	positive regulation of prostaglandin-E synthase activity	2/117	3/18870	0.000113887	0.00116015	0.000642789	ITGAM/ITGB2	2
BP	GO:1904994	regulation of leukocyte adhesion to vascular endothelial cell	4/117	41/18870	0.000119074	0.00120828	0.000669458	ELANE/IL6/ITGB2/SELE	4
BP	GO:0002263	cell activation involved in immune response	9/117	305/18870	0.000120084	0.00121382	0.000672529	CLEC4E/CR1/GATA1/ICAM1/IL6/ITGAM/ITGB2/PTGDS/TLR4	9
BP	GO:0034374	low-density lipoprotein particle remodeling	3/117	16/18870	0.000122654	0.0012256	0.000679054	MPO/PLA2G10/PLA2G2A	3
BP	GO:0051004	regulation of lipoprotein lipase activity	3/117	16/18870	0.000122654	0.0012256	0.000679054	APOC2/APOH/GPIHBP1	3
BP	GO:0051770	positive regulation of nitric-oxide synthase biosynthetic process	3/117	16/18870	0.000122654	0.0012256	0.000679054	CCL2/TLR2/TLR4	3
BP	GO:0045921	positive regulation of exocytosis	5/117	78/18870	0.000123748	0.00122717	0.000679923	FGA/FGG/GATA1/ITGAM/ITGB2	5
BP	GO:0046209	nitric oxide metabolic process	5/117	78/18870	0.000123748	0.00122717	0.000679923	CD36/CLU/HBB/TLR2/TLR4	5
BP	GO:0002696	positive regulation of leukocyte activation	10/117	380/18870	0.000128437	0.00126886	0.000703023	AGER/AIF1/CCL2/CR1/GATA1/HAMP/IL6/ITGAM/ITGB2/TLR4	10
BP	GO:0042119	neutrophil activation	4/117	42/18870	0.000130981	0.001289	0.000714184	CTSG/ITGAM/ITGB2/PLA2G2A	4
BP	GO:2001057	reactive nitrogen species metabolic process	5/117	79/18870	0.000131461	0.001289	0.000714184	CD36/CLU/HBB/TLR2/TLR4	5
BP	GO:0032944	regulation of mononuclear cell proliferation	8/117	242/18870	0.000133644	0.0013025	0.00072166	AGER/AIF1/CD22/CR1/CSF1/IL6/PLA2G2A/TLR4	8
BP	GO:1903037	regulation of leukocyte cell-cell adhesion	10/117	382/18870	0.000134052	0.0013025	0.00072166	AGER/AIF1/CCL2/CR1/CTSG/ELANE/IL6/ITGB2/PLA2G2A/SELE	10
BP	GO:0002688	regulation of leukocyte chemotaxis	6/117	126/18870	0.000134329	0.0013025	0.00072166	AIF1/C5/CCL2/CSF1/IL6/MMP28	6
BP	GO:0032735	positive regulation of interleukin-12 production	4/117	43/18870	0.000143728	0.00138338	0.000766473	AGER/CD36/TLR2/TLR4	4
BP	GO:1904646	cellular response to amyloid-beta	4/117	43/18870	0.000143728	0.00138338	0.000766473	AGER/CD36/ICAM1/TLR4	4
BP	GO:0070372	regulation of ERK1 and ERK2 cascade	9/117	313/18870	0.000145927	0.00139927	0.000775278	AGER/CCL2/CD36/FGA/FGG/ICAM1/PLA2G2A/SERPINF2/TLR4	9
BP	GO:0030301	cholesterol transport	6/117	128/18870	0.000146448	0.00139927	0.000775278	APOC2/CD36/CLU/MSR1/PLA2G10/PPARG	6
BP	GO:0036005	response to macrophage colony-stimulating factor	3/117	17/18870	0.000148264	0.00141147	0.000782038	CSF1/TLR2/TLR4	3
BP	GO:0032943	mononuclear cell proliferation	9/117	314/18870	0.000149462	0.00141772	0.000785501	ACE/AGER/AIF1/CD22/CR1/CSF1/IL6/PLA2G2A/TLR4	9
BP	GO:0071621	granulocyte chemotaxis	6/117	130/18870	0.000159416	0.00150669	0.000834793	CCL2/CSF1/ITGB2/PF4/PPBP/S100A12	6
BP	GO:0061844	antimicrobial humoral immune response mediated by antimicrobial peptide	5/117	83/18870	0.000166056	0.00156379	0.000866432	ELANE/LTF/PF4/PPBP/S100A12	5
BP	GO:0002693	positive regulation of cellular extravasation	3/117	18/18870	0.000177113	0.00165012	0.000914262	AGER/ICAM1/LYVE1	3
BP	GO:0010755	regulation of plasminogen activation	3/117	18/18870	0.000177113	0.00165012	0.000914262	CLEC3B/CPB2/SERPINF2	3
BP	GO:0030730	sequestering of triglyceride	3/117	18/18870	0.000177113	0.00165012	0.000914262	LPL/PLIN2/PPARG	3
BP	GO:0050867	positive regulation of cell activation	10/117	396/18870	0.000179484	0.00166628	0.000923215	AGER/AIF1/CCL2/CR1/GATA1/HAMP/IL6/ITGAM/ITGB2/TLR4	10
BP	GO:0006979	response to oxidative stress	10/117	400/18870	0.000194628	0.00180048	0.00099757	AIF1/CD36/GPX3/HBA1/HBA2/HBB/HMOX1/HP/IL6/MPO	10
BP	GO:0045346	regulation of MHC class II biosynthetic process	3/117	19/18870	0.000209373	0.00193006	0.00106937	AZU1/PF4/TLR4	3
BP	GO:0043315	positive regulation of neutrophil degranulation	2/117	4/18870	0.00022685	0.00207655	0.00115053	ITGAM/ITGB2	2
BP	GO:0150062	complement-mediated synapse pruning	2/117	4/18870	0.00022685	0.00207655	0.00115053	C3/ITGAM	2
BP	GO:0001909	leukocyte mediated cytotoxicity	6/117	140/18870	0.000238535	0.00217226	0.00120356	AGER/AZU1/CTSG/ELANE/ICAM1/ITGAM	6
BP	GO:0010543	regulation of platelet activation	4/117	49/18870	0.000239795	0.00217226	0.00120356	CTSG/IL6/THBD/TLR4	4
BP	GO:0036230	granulocyte activation	4/117	49/18870	0.000239795	0.00217226	0.00120356	CTSG/ITGAM/ITGB2/PLA2G2A	4
BP	GO:0042953	lipoprotein transport	3/117	20/18870	0.000245209	0.00219098	0.00121393	CD36/MSR1/PPARG	3
BP	GO:0045342	MHC class II biosynthetic process	3/117	20/18870	0.000245209	0.00219098	0.00121393	AZU1/PF4/TLR4	3
BP	GO:0051767	nitric-oxide synthase biosynthetic process	3/117	20/18870	0.000245209	0.00219098	0.00121393	CCL2/TLR2/TLR4	3
BP	GO:0051769	regulation of nitric-oxide synthase biosynthetic process	3/117	20/18870	0.000245209	0.00219098	0.00121393	CCL2/TLR2/TLR4	3
BP	GO:0070371	ERK1 and ERK2 cascade	9/117	336/18870	0.000247384	0.00219993	0.00121889	AGER/CCL2/CD36/FGA/FGG/ICAM1/PLA2G2A/SERPINF2/TLR4	9
BP	GO:0015918	sterol transport	6/117	141/18870	0.000247891	0.00219993	0.00121889	APOC2/CD36/CLU/MSR1/PLA2G10/PPARG	6
BP	GO:0002220	innate immune response activating cell surface receptor signaling pathway	5/117	91/18870	0.000255711	0.00226166	0.00125309	FCN1/FCN3/LTF/TLR2/TLR4	5
BP	GO:1902041	regulation of extrinsic apoptotic signaling pathway via death domain receptors	4/117	50/18870	0.000259407	0.00228662	0.00126692	FGA/FGG/HMOX1/ICAM1	4
BP	GO:0070663	regulation of leukocyte proliferation	8/117	267/18870	0.00026107	0.00229356	0.00127077	AGER/AIF1/CD22/CR1/CSF1/IL6/PLA2G2A/TLR4	8
BP	GO:0034341	response to type II interferon	6/117	143/18870	0.00026747	0.00234193	0.00129757	AIF1/CCL2/MRC1/PPARG/TLR2/TLR4	6
BP	GO:0050886	endocrine process	5/117	92/18870	0.000269082	0.00234818	0.00130103	ACE/CTSG/PPARG/RETN/SERPINF2	5
BP	GO:0050714	positive regulation of protein secretion	6/117	144/18870	0.000277704	0.00240738	0.00133383	FGA/FGG/PPARG/RBP4/TLR2/TLR4	6
BP	GO:1904019	epithelial cell apoptotic process	6/117	144/18870	0.000277704	0.00240738	0.00133383	CCL2/FGA/FGG/HMOX1/ICAM1/IL6	6
BP	GO:0002888	positive regulation of myeloid leukocyte mediated immunity	3/117	21/18870	0.000284787	0.0024445	0.0013544	C3/ITGAM/ITGB2	3
BP	GO:0034104	negative regulation of tissue remodeling	3/117	21/18870	0.000284787	0.0024445	0.0013544	HAMP/IL6/PPARG	3
BP	GO:0044872	lipoprotein localization	3/117	21/18870	0.000284787	0.0024445	0.0013544	CD36/MSR1/PPARG	3
BP	GO:0050921	positive regulation of chemotaxis	6/117	145/18870	0.000288244	0.00246609	0.00136636	AGER/AIF1/AZU1/CSF1/F3/IL6	6
BP	GO:0002768	immune response-regulating cell surface receptor signaling pathway	9/117	346/18870	0.000306925	0.00261736	0.00145017	CD22/CLEC4E/CR1/FCN1/FCN3/LTF/PIGR/TLR2/TLR4	9
BP	GO:1903039	positive regulation of leukocyte cell-cell adhesion	8/117	275/18870	0.000318353	0.002706	0.00149928	AGER/AIF1/CCL2/CR1/ELANE/IL6/ITGB2/SELE	8
BP	GO:0048260	positive regulation of receptor-mediated endocytosis	4/117	53/18870	0.000325151	0.00274596	0.00152142	C3/CLU/SELE/VTN	4
BP	GO:1904645	response to amyloid-beta	4/117	53/18870	0.000325151	0.00274596	0.00152142	AGER/CD36/ICAM1/TLR4	4
BP	GO:0015669	gas transport	3/117	22/18870	0.000328266	0.00276334	0.00153106	HBA1/HBA2/HBB	3
BP	GO:0046942	carboxylic acid transport	9/117	351/18870	0.000340877	0.00286031	0.00158478	ACE/CD36/FABP3/LRP2/PLA2G10/PLA2G2A/PLIN2/PPARG/RBP2	9
BP	GO:0051701	biological process involved in interaction with host	7/117	211/18870	0.000347108	0.00290171	0.00160772	CLEC4M/CR1/FCN1/FCN3/ICAM1/LTF/MRC1	7
BP	GO:0015849	organic acid transport	9/117	352/18870	0.000348027	0.00290171	0.00160772	ACE/CD36/FABP3/LRP2/PLA2G10/PLA2G2A/PLIN2/PPARG/RBP2	9
BP	GO:0002686	negative regulation of leukocyte migration	4/117	55/18870	0.000375114	0.00307104	0.00170154	C5/CCL2/HMOX1/MMP28	4
BP	GO:0002689	negative regulation of leukocyte chemotaxis	3/117	23/18870	0.000375804	0.00307104	0.00170154	C5/CCL2/MMP28	3
BP	GO:0045860	positive regulation of protein kinase activity	8/117	282/18870	0.000376543	0.00307104	0.00170154	ACE/AZU1/CLU/CSF1/ELANE/LTF/S100A12/TLR4	8
BP	GO:0002434	immune complex clearance	2/117	5/18870	0.000376548	0.00307104	0.00170154	CLU/CR1	2
BP	GO:0043152	induction of bacterial agglutination	2/117	5/18870	0.000376548	0.00307104	0.00170154	DMBT1/FGA	2
BP	GO:0071724	response to diacyl bacterial lipopeptide	2/117	5/18870	0.000376548	0.00307104	0.00170154	CD36/TLR2	2
BP	GO:0071726	cellular response to diacyl bacterial lipopeptide	2/117	5/18870	0.000376548	0.00307104	0.00170154	CD36/TLR2	2
BP	GO:0042632	cholesterol homeostasis	5/117	100/18870	0.000396073	0.00322025	0.00178421	APOC2/FABP3/GPIHBP1/LPL/PLA2G10	5
BP	GO:0008037	cell recognition	6/117	154/18870	0.000397923	0.00322527	0.00178699	C4BPA/CD36/CFP/CLEC4M/FCN1/FCN3	6
BP	GO:0055092	sterol homeostasis	5/117	101/18870	0.000414661	0.00335056	0.00185641	APOC2/FABP3/GPIHBP1/LPL/PLA2G10	5
BP	GO:0051346	negative regulation of hydrolase activity	7/117	218/18870	0.000422367	0.00339193	0.00187933	CR1/LTF/SERPINA1/SERPINA3/SERPINF2/SERPING1/VTN	7
BP	GO:0046718	viral entry into host cell	6/117	156/18870	0.000426217	0.00339193	0.00187933	CLEC4M/CR1/FCN1/FCN3/ICAM1/MRC1	6
BP	GO:0097530	granulocyte migration	6/117	156/18870	0.000426217	0.00339193	0.00187933	CCL2/CSF1/ITGB2/PF4/PPBP/S100A12	6
BP	GO:0003081	regulation of systemic arterial blood pressure by renin-angiotensin	3/117	24/18870	0.000427554	0.00339193	0.00187933	ACE/CTSG/SERPINF2	3
BP	GO:0030277	maintenance of gastrointestinal epithelium	3/117	24/18870	0.000427554	0.00339193	0.00187933	RBP4/SERPINA3/TLR4	3
BP	GO:0034114	regulation of heterotypic cell-cell adhesion	3/117	24/18870	0.000427554	0.00339193	0.00187933	AGER/FGA/FGG	3
BP	GO:0015711	organic anion transport	10/117	443/18870	0.000437564	0.00346086	0.00191752	ACE/CD36/CR1/FABP3/LRP2/PLA2G10/PLA2G2A/PLIN2/PPARG/RBP2	10
BP	GO:0022600	digestive system process	5/117	103/18870	0.000453804	0.00357849	0.0019827	CD36/HAMP/RBP4/SERPINA3/TLR4	5
BP	GO:0031663	lipopolysaccharide-mediated signaling pathway	4/117	58/18870	0.00046002	0.00359502	0.00199185	CD36/LTF/TLR2/TLR4	4
BP	GO:0045428	regulation of nitric oxide biosynthetic process	4/117	58/18870	0.00046002	0.00359502	0.00199185	CD36/CLU/HBB/TLR4	4
BP	GO:0061756	leukocyte adhesion to vascular endothelial cell	4/117	58/18870	0.00046002	0.00359502	0.00199185	ELANE/IL6/ITGB2/SELE	4
BP	GO:0043302	positive regulation of leukocyte degranulation	3/117	25/18870	0.000483667	0.00374627	0.00207566	GATA1/ITGAM/ITGB2	3
BP	GO:0050927	positive regulation of positive chemotaxis	3/117	25/18870	0.000483667	0.00374627	0.00207566	AGER/AZU1/F3	3
BP	GO:0060586	multicellular organismal-level iron ion homeostasis	3/117	25/18870	0.000483667	0.00374627	0.00207566	HAMP/HMOX1/SLC40A1	3
BP	GO:0002886	regulation of myeloid leukocyte mediated immunity	4/117	59/18870	0.000491132	0.00378172	0.00209529	C3/GATA1/ITGAM/ITGB2	4
BP	GO:0006826	iron ion transport	4/117	59/18870	0.000491132	0.00378172	0.00209529	CP/HAMP/LTF/SLC40A1	4
BP	GO:0006641	triglyceride metabolic process	5/117	106/18870	0.000517662	0.00396268	0.00219556	APOC2/APOH/C3/GPIHBP1/LPL	5
BP	GO:0032963	collagen metabolic process	5/117	106/18870	0.000517662	0.00396268	0.00219556	IL6/MMP23B/MMP28/MMP7/SERPINF2	5
BP	GO:0060193	positive regulation of lipase activity	4/117	60/18870	0.000523714	0.00398571	0.00220832	APOC2/APOH/GPIHBP1/SELE	4
BP	GO:0080164	regulation of nitric oxide metabolic process	4/117	60/18870	0.000523714	0.00398571	0.00220832	CD36/CLU/HBB/TLR4	4
BP	GO:0044409	entry into host	6/117	163/18870	0.000537818	0.00408118	0.00226121	CLEC4M/CR1/FCN1/FCN3/ICAM1/MRC1	6
BP	GO:0030593	neutrophil chemotaxis	5/117	107/18870	0.000540379	0.00408876	0.00226542	CCL2/ITGB2/PF4/PPBP/S100A12	5
BP	GO:0002438	acute inflammatory response to antigenic stimulus	3/117	26/18870	0.000544291	0.00409469	0.0022687	A2M/C3/ELANE	3
BP	GO:0050926	regulation of positive chemotaxis	3/117	26/18870	0.000544291	0.00409469	0.0022687	AGER/AZU1/F3	3
BP	GO:0034113	heterotypic cell-cell adhesion	4/117	61/18870	0.000557805	0.00413681	0.00229204	AGER/FGA/FGG/ITGB2	4
BP	GO:2000351	regulation of endothelial cell apoptotic process	4/117	61/18870	0.000557805	0.00413681	0.00229204	CCL2/FGA/FGG/ICAM1	4
BP	GO:0030451	regulation of complement activation, alternative pathway	2/117	6/18870	0.000562531	0.00413681	0.00229204	CFH/CR1	2
BP	GO:0033239	negative regulation of amine metabolic process	2/117	6/18870	0.000562531	0.00413681	0.00229204	ITGAM/ITGB2	2
BP	GO:0034382	chylomicron remnant clearance	2/117	6/18870	0.000562531	0.00413681	0.00229204	APOC2/GPIHBP1	2
BP	GO:0036335	intestinal stem cell homeostasis	2/117	6/18870	0.000562531	0.00413681	0.00229204	PLA2G10/PLA2G2A	2
BP	GO:0046813	receptor-mediated virion attachment to host cell	2/117	6/18870	0.000562531	0.00413681	0.00229204	CLEC4M/ICAM1	2
BP	GO:1902565	positive regulation of neutrophil activation	2/117	6/18870	0.000562531	0.00413681	0.00229204	ITGAM/ITGB2	2
BP	GO:0097191	extrinsic apoptotic signaling pathway	7/117	229/18870	0.000566487	0.00415424	0.00230169	FGA/FGG/GATA1/HMOX1/ICAM1/PF4/TLR4	7
BP	GO:0022617	extracellular matrix disassembly	4/117	62/18870	0.000593443	0.00432767	0.00239779	CTSG/ELANE/IL6/MMP7	4
BP	GO:0043030	regulation of macrophage activation	4/117	62/18870	0.000593443	0.00432767	0.00239779	HAMP/IL6/PLA2G10/TLR4	4
BP	GO:0150146	cell junction disassembly	3/117	27/18870	0.000609569	0.00443292	0.0024561	C1QB/C3/ITGAM	3
BP	GO:0001818	negative regulation of cytokine production	9/117	381/18870	0.000616237	0.004469	0.00247609	AGER/CD34/CR1/ELANE/IL6/LTF/ORM1/PLA2G10/TLR4	9
BP	GO:0031341	regulation of cell killing	5/117	111/18870	0.000638818	0.00461996	0.00255973	AGER/CFH/CR1/ICAM1/ITGAM	5
BP	GO:0002573	myeloid leukocyte differentiation	7/117	235/18870	0.000660173	0.00476124	0.00263801	CSF1/GATA1/LTF/PF4/PPARG/TLR2/TLR4	7
BP	GO:0030225	macrophage differentiation	4/117	64/18870	0.000669522	0.00478909	0.00265344	CSF1/PF4/TLR2/TLR4	4
BP	GO:0032615	interleukin-12 production	4/117	64/18870	0.000669522	0.00478909	0.00265344	AGER/CD36/TLR2/TLR4	4
BP	GO:0032655	regulation of interleukin-12 production	4/117	64/18870	0.000669522	0.00478909	0.00265344	AGER/CD36/TLR2/TLR4	4
BP	GO:0051222	positive regulation of protein transport	8/117	308/18870	0.000673341	0.00480329	0.00266131	FGA/FGG/ITGAM/ITGB2/PPARG/RBP4/TLR2/TLR4	8
BP	GO:0002221	pattern recognition receptor signaling pathway	7/117	236/18870	0.000676917	0.00480894	0.00266443	CD36/CLEC4E/FCN1/FCN3/LTF/TLR2/TLR4	7
BP	GO:0010758	regulation of macrophage chemotaxis	3/117	28/18870	0.000679643	0.00480894	0.00266443	C5/CSF1/MMP28	3
BP	GO:0019433	triglyceride catabolic process	3/117	28/18870	0.000679643	0.00480894	0.00266443	APOC2/GPIHBP1/LPL	3
BP	GO:0032613	interleukin-10 production	4/117	65/18870	0.00071004	0.00497991	0.00275917	AGER/IL6/TLR2/TLR4	4
BP	GO:0032653	regulation of interleukin-10 production	4/117	65/18870	0.00071004	0.00497991	0.00275917	AGER/IL6/TLR2/TLR4	4
BP	GO:0046503	glycerolipid catabolic process	4/117	65/18870	0.00071004	0.00497991	0.00275917	APOC2/GPIHBP1/LPL/PLA2G10	4
BP	GO:0050670	regulation of lymphocyte proliferation	7/117	238/18870	0.000711416	0.00497991	0.00275917	AGER/AIF1/CD22/CR1/IL6/PLA2G2A/TLR4	7
BP	GO:0002262	myeloid cell homeostasis	6/117	173/18870	0.000735251	0.00513303	0.002844	CSF1/GATA1/HAMP/HMOX1/IL6/PLA2G10	6
BP	GO:0048259	regulation of receptor-mediated endocytosis	5/117	115/18870	0.000750123	0.00522293	0.00289381	APOC2/C3/CLU/SELE/VTN	5
BP	GO:1905953	negative regulation of lipid localization	4/117	66/18870	0.000752263	0.00522394	0.00289437	APOC2/IL6/PLA2G10/PPARG	4
BP	GO:0097421	liver regeneration	3/117	29/18870	0.000754651	0.00522666	0.00289588	CPB2/IL6/VTN	3
BP	GO:0055088	lipid homeostasis	6/117	175/18870	0.000780705	0.00533357	0.00295511	APOC2/FABP3/GPIHBP1/LPL/PLA2G10/PPARG	6
BP	GO:0001878	response to yeast	2/117	7/18870	0.000784349	0.00533357	0.00295511	ELANE/MPO	2
BP	GO:0010760	negative regulation of macrophage chemotaxis	2/117	7/18870	0.000784349	0.00533357	0.00295511	C5/MMP28	2
BP	GO:0042482	positive regulation of odontogenesis	2/117	7/18870	0.000784349	0.00533357	0.00295511	CD34/CSF1	2
BP	GO:0043654	recognition of apoptotic cell	2/117	7/18870	0.000784349	0.00533357	0.00295511	FCN1/FCN3	2
BP	GO:0045917	positive regulation of complement activation	2/117	7/18870	0.000784349	0.00533357	0.00295511	C3/CR1	2
BP	GO:0071830	triglyceride-rich lipoprotein particle clearance	2/117	7/18870	0.000784349	0.00533357	0.00295511	APOC2/GPIHBP1	2
BP	GO:0048872	homeostasis of number of cells	8/117	316/18870	0.000795429	0.00538639	0.00298438	CSF1/GATA1/HAMP/HMOX1/IL6/PLA2G10/PLA2G2A/SLC40A1	8
BP	GO:0072577	endothelial cell apoptotic process	4/117	67/18870	0.000796232	0.00538639	0.00298438	CCL2/FGA/FGG/ICAM1	4
BP	GO:2001234	negative regulation of apoptotic signaling pathway	7/117	243/18870	0.000803788	0.0054235	0.00300494	CLU/FGA/FGG/GATA1/HMOX1/ICAM1/PF4	7
BP	GO:0010039	response to iron ion	3/117	30/18870	0.000834728	0.00560338	0.0031046	HAMP/HMOX1/SLC40A1	3
BP	GO:0010575	positive regulation of vascular endothelial growth factor production	3/117	30/18870	0.000834728	0.00560338	0.0031046	C3/C5/IL6	3
BP	GO:2000379	positive regulation of reactive oxygen species metabolic process	4/117	68/18870	0.000841984	0.00563763	0.00312358	CD36/ITGAM/ITGB2/TLR4	4
BP	GO:0019058	viral life cycle	8/117	321/18870	0.000880378	0.00587967	0.00325768	CCL2/CLEC4M/CR1/FCN1/FCN3/ICAM1/LTF/MRC1	8
BP	GO:0034755	iron ion transmembrane transport	3/117	31/18870	0.000920005	0.00608226	0.00336993	HAMP/LTF/SLC40A1	3
BP	GO:0050482	arachidonic acid secretion	3/117	31/18870	0.000920005	0.00608226	0.00336993	ACE/PLA2G10/PLA2G2A	3
BP	GO:0090322	regulation of superoxide metabolic process	3/117	31/18870	0.000920005	0.00608226	0.00336993	CD36/ITGAM/ITGB2	3
BP	GO:1903963	arachidonate transport	3/117	31/18870	0.000920005	0.00608226	0.00336993	ACE/PLA2G10/PLA2G2A	3
BP	GO:1904951	positive regulation of establishment of protein localization	8/117	324/18870	0.000934751	0.00616417	0.00341532	FGA/FGG/ITGAM/ITGB2/PPARG/RBP4/TLR2/TLR4	8
BP	GO:0051702	biological process involved in interaction with symbiont	5/117	121/18870	0.000943459	0.00620597	0.00343847	AZU1/CTSG/ELANE/LTF/PF4	5
BP	GO:0042593	glucose homeostasis	7/117	251/18870	0.000971076	0.00637162	0.00353025	ACE/AGER/CPB2/ICAM1/IL6/PPARG/RBP4	7
BP	GO:0021782	glial cell development	5/117	122/18870	0.000978971	0.00640737	0.00355006	AGER/CLU/IL6/TLR2/TLR4	5
BP	GO:0033500	carbohydrate homeostasis	7/117	252/18870	0.000993782	0.00648808	0.00359478	ACE/AGER/CPB2/ICAM1/IL6/PPARG/RBP4	7
BP	GO:0045907	positive regulation of vasoconstriction	3/117	32/18870	0.00101061	0.00658155	0.00364656	ACE/FGA/FGG	3
BP	GO:0010811	positive regulation of cell-substrate adhesion	5/117	123/18870	0.00101547	0.00659676	0.00365499	CD36/CSF1/FGA/FGG/VTN	5
BP	GO:0007597	blood coagulation, intrinsic pathway	2/117	8/18870	0.00104156	0.00659958	0.00365656	APOH/F8	2
BP	GO:0010757	negative regulation of plasminogen activation	2/117	8/18870	0.00104156	0.00659958	0.00365656	CPB2/SERPINF2	2
BP	GO:0010911	regulation of isomerase activity	2/117	8/18870	0.00104156	0.00659958	0.00365656	ITGAM/ITGB2	2
BP	GO:0010912	positive regulation of isomerase activity	2/117	8/18870	0.00104156	0.00659958	0.00365656	ITGAM/ITGB2	2
BP	GO:0017038	protein import	2/117	8/18870	0.00104156	0.00659958	0.00365656	CLU/GPIHBP1	2
BP	GO:0034196	acylglycerol transport	2/117	8/18870	0.00104156	0.00659958	0.00365656	APOH/CD36	2
BP	GO:0034197	triglyceride transport	2/117	8/18870	0.00104156	0.00659958	0.00365656	APOH/CD36	2
BP	GO:0043313	regulation of neutrophil degranulation	2/117	8/18870	0.00104156	0.00659958	0.00365656	ITGAM/ITGB2	2
BP	GO:0045959	negative regulation of complement activation, classical pathway	2/117	8/18870	0.00104156	0.00659958	0.00365656	C4BPA/CR1	2
BP	GO:1903659	regulation of complement-dependent cytotoxicity	2/117	8/18870	0.00104156	0.00659958	0.00365656	CFH/CR1	2
BP	GO:0006801	superoxide metabolic process	4/117	72/18870	0.00104363	0.00659958	0.00365656	CD36/ITGAM/ITGB2/MPO	4
BP	GO:0002758	innate immune response-activating signaling pathway	7/117	255/18870	0.00106442	0.00671481	0.0037204	CD36/CLEC4E/FCN1/FCN3/LTF/TLR2/TLR4	7
BP	GO:0002698	negative regulation of immune effector process	5/117	125/18870	0.00109148	0.00686899	0.00380582	A2M/C4BPA/CD22/CR1/SERPING1	5
BP	GO:0006809	nitric oxide biosynthetic process	4/117	73/18870	0.0010989	0.00688259	0.00381336	CD36/CLU/HBB/TLR4	4
BP	GO:0006879	intracellular iron ion homeostasis	4/117	73/18870	0.0010989	0.00688259	0.00381336	CP/HAMP/HMOX1/SLC40A1	4
BP	GO:0002764	immune response-regulating signaling pathway	10/117	500/18870	0.00110688	0.00691603	0.00383189	CD22/CD36/CLEC4E/CR1/FCN1/FCN3/LTF/PIGR/TLR2/TLR4	10
BP	GO:0044000	movement in host	6/117	188/18870	0.00113146	0.00705276	0.00390764	CLEC4M/CR1/FCN1/FCN3/ICAM1/MRC1	6
BP	GO:0033674	positive regulation of kinase activity	8/117	337/18870	0.00120237	0.00747699	0.00414269	ACE/AZU1/CLU/CSF1/ELANE/LTF/S100A12/TLR4	8
BP	GO:0010669	epithelial structure maintenance	3/117	34/18870	0.00120831	0.00749613	0.0041533	RBP4/SERPINA3/TLR4	3
BP	GO:0002700	regulation of production of molecular mediator of immune response	6/117	191/18870	0.00122728	0.00759581	0.00420853	CD22/CD36/CR1/IL6/RBP4/TLR4	6
BP	GO:0002456	T cell mediated immunity	5/117	129/18870	0.00125607	0.00773742	0.00428699	AGER/C4BPA/CR1/ICAM1/IL6	5
BP	GO:1990266	neutrophil migration	5/117	129/18870	0.00125607	0.00773742	0.00428699	CCL2/ITGB2/PF4/PPBP/S100A12	5
BP	GO:0040013	negative regulation of locomotion	9/117	423/18870	0.00128513	0.00789785	0.00437587	AIF1/APOH/C5/CCL2/CLDN5/ELANE/HMOX1/MMP28/PPARG	9
BP	GO:0002003	angiotensin maturation	2/117	9/18870	0.00133372	0.0080826	0.00447824	ACE/CTSG	2
BP	GO:0010890	positive regulation of sequestering of triglyceride	2/117	9/18870	0.00133372	0.0080826	0.00447824	LPL/PLIN2	2
BP	GO:0019062	virion attachment to host cell	2/117	9/18870	0.00133372	0.0080826	0.00447824	CLEC4M/ICAM1	2
BP	GO:0030450	regulation of complement activation, classical pathway	2/117	9/18870	0.00133372	0.0080826	0.00447824	C4BPA/CR1	2
BP	GO:0061518	microglial cell proliferation	2/117	9/18870	0.00133372	0.0080826	0.00447824	CLU/CSF1	2
BP	GO:0071281	cellular response to iron ion	2/117	9/18870	0.00133372	0.0080826	0.00447824	HMOX1/SLC40A1	2
BP	GO:0002637	regulation of immunoglobulin production	4/117	77/18870	0.00134059	0.00810549	0.00449092	CD22/CR1/IL6/RBP4	4
BP	GO:0050708	regulation of protein secretion	7/117	266/18870	0.00135786	0.00819099	0.00453829	FGA/FGG/IL6/PPARG/RBP4/TLR2/TLR4	7
BP	GO:0060191	regulation of lipase activity	4/117	78/18870	0.00140637	0.00846408	0.0046896	APOC2/APOH/GPIHBP1/SELE	4
BP	GO:2000352	negative regulation of endothelial cell apoptotic process	3/117	36/18870	0.00142881	0.00857942	0.00475351	FGA/FGG/ICAM1	3
BP	GO:0006639	acylglycerol metabolic process	5/117	134/18870	0.0014868	0.00888687	0.00492385	APOC2/APOH/C3/GPIHBP1/LPL	5
BP	GO:0007586	digestion	5/117	134/18870	0.0014868	0.00888687	0.00492385	CD36/HAMP/RBP4/SERPINA3/TLR4	5
BP	GO:0051235	maintenance of location	8/117	350/18870	0.00152797	0.00911213	0.00504866	C3/CD36/IL6/LPL/MSR1/PLA2G10/PLIN2/PPARG	8
BP	GO:0006638	neutral lipid metabolic process	5/117	135/18870	0.00153645	0.0091419	0.00506515	APOC2/APOH/C3/GPIHBP1/LPL	5
BP	GO:0043299	leukocyte degranulation	4/117	81/18870	0.00161717	0.00960035	0.00531916	GATA1/ITGAM/ITGB2/PTGDS	4
BP	GO:0001935	endothelial cell proliferation	6/117	202/18870	0.00163275	0.00966684	0.005356	APOH/CCL2/CD34/F3/HMOX1/PPARG	6
BP	GO:0002002	regulation of angiotensin levels in blood	2/117	10/18870	0.0016604	0.00966684	0.005356	ACE/CTSG	2
BP	GO:0044650	adhesion of symbiont to host cell	2/117	10/18870	0.0016604	0.00966684	0.005356	CLEC4M/ICAM1	2
BP	GO:0060068	vagina development	2/117	10/18870	0.0016604	0.00966684	0.005356	LRP2/RBP4	2
BP	GO:0070339	response to bacterial lipopeptide	2/117	10/18870	0.0016604	0.00966684	0.005356	CD36/TLR2	2
BP	GO:0071220	cellular response to bacterial lipoprotein	2/117	10/18870	0.0016604	0.00966684	0.005356	CD36/TLR2	2
BP	GO:0071221	cellular response to bacterial lipopeptide	2/117	10/18870	0.0016604	0.00966684	0.005356	CD36/TLR2	2
BP	GO:1904179	positive regulation of adipose tissue development	2/117	10/18870	0.0016604	0.00966684	0.005356	LPL/PPARG	2
BP	GO:0001990	regulation of systemic arterial blood pressure by hormone	3/117	38/18870	0.00167303	0.00966684	0.005356	ACE/CTSG/SERPINF2	3
BP	GO:0035633	maintenance of blood-brain barrier	3/117	38/18870	0.00167303	0.00966684	0.005356	CLDN5/IL6/OCLN	3
BP	GO:0046461	neutral lipid catabolic process	3/117	38/18870	0.00167303	0.00966684	0.005356	APOC2/GPIHBP1/LPL	3
BP	GO:0046464	acylglycerol catabolic process	3/117	38/18870	0.00167303	0.00966684	0.005356	APOC2/GPIHBP1/LPL	3
BP	GO:0002218	activation of innate immune response	7/117	276/18870	0.00167637	0.00966684	0.005356	CD36/CLEC4E/FCN1/FCN3/LTF/TLR2/TLR4	7
CC	GO:0072562	blood microparticle	24/118	144/19886	2.3094e-28	4.24929e-26	2.35802e-26	A2M/C1QB/C1R/C1S/C3/C4A/C4BPA/CFH/CLU/CP/F13A1/FCN3/FGA/FGG/HBA1/HBA2/HBB/HP/ORM1/ORM2/SERPINA3/SERPINF2/SERPING1/VTN	24
CC	GO:0034774	secretory granule lumen	30/118	322/19886	1.29827e-27	8.65126e-26	4.80075e-26	A2M/APOH/AZU1/C3/CFP/CLEC3B/CLU/CTSG/ELANE/F13A1/F8/FCN1/FGA/FGG/HP/ITIH3/LTF/MPO/ORM1/ORM2/PF4/PPBP/QSOX1/RETN/S100A12/SERPINA1/SERPINA3/SERPINF2/SERPING1/VWF	30
CC	GO:0060205	cytoplasmic vesicle lumen	30/118	325/19886	1.71509e-27	8.65126e-26	4.80075e-26	A2M/APOH/AZU1/C3/CFP/CLEC3B/CLU/CTSG/ELANE/F13A1/F8/FCN1/FGA/FGG/HP/ITIH3/LTF/MPO/ORM1/ORM2/PF4/PPBP/QSOX1/RETN/S100A12/SERPINA1/SERPINA3/SERPINF2/SERPING1/VWF	30
CC	GO:0031983	vesicle lumen	30/118	326/19886	1.88071e-27	8.65126e-26	4.80075e-26	A2M/APOH/AZU1/C3/CFP/CLEC3B/CLU/CTSG/ELANE/F13A1/F8/FCN1/FGA/FGG/HP/ITIH3/LTF/MPO/ORM1/ORM2/PF4/PPBP/QSOX1/RETN/S100A12/SERPINA1/SERPINA3/SERPINF2/SERPING1/VWF	30
CC	GO:0062023	collagen-containing extracellular matrix	29/118	429/19886	1.04067e-22	3.82965e-21	2.12515e-21	A2M/APOH/AZGP1/C1QB/CFP/CLEC3B/CLU/CTSG/ELANE/ELN/F13A1/F3/FCN1/FCN3/FGA/FGG/ICAM1/MMP23B/MMP28/ORM1/ORM2/PF4/PRG4/SERPINA1/SERPINA3/SERPINF2/SERPING1/VTN/VWF	29
CC	GO:0031093	platelet alpha granule lumen	16/118	67/19886	7.19341e-22	2.20598e-20	1.22414e-20	A2M/CLU/F13A1/F8/FGA/FGG/ORM1/ORM2/PF4/PPBP/QSOX1/SERPINA1/SERPINA3/SERPINF2/SERPING1/VWF	16
CC	GO:0031091	platelet alpha granule	17/118	91/19886	3.38468e-21	8.89687e-20	4.93705e-20	A2M/CD36/CLU/F13A1/F8/FGA/FGG/ORM1/ORM2/PF4/PPBP/QSOX1/SERPINA1/SERPINA3/SERPINF2/SERPING1/VWF	17
CC	GO:0009897	external side of plasma membrane	24/118	387/19886	5.59892e-18	1.28775e-16	7.14599e-17	ACE/ASGR1/AZGP1/CD163/CD22/CD34/CD36/CLEC4E/CLEC4M/F10/F3/FCGRT/FCN1/FCN3/FGA/FGG/GPIHBP1/ICAM1/ITGAM/ITGB2/LRP2/SELE/THBD/TLR4	24
CC	GO:0042581	specific granule	12/118	160/19886	1.98674e-10	4.06178e-09	2.25396e-09	CD36/CFP/ELANE/HP/ITGAM/ITGB2/LTF/OLR1/ORM1/ORM2/QSOX1/RETN	12
CC	GO:0030139	endocytic vesicle	16/118	348/19886	2.5379e-10	4.66973e-09	2.59133e-09	CD163/CD36/CLEC4E/DMBT1/ELANE/HBA1/HBA2/HBB/HP/LRP2/LTF/MPO/MSR1/OCLN/STAB1/TLR2	16
CC	GO:0005788	endoplasmic reticulum lumen	15/118	313/19886	5.42839e-10	9.08022e-09	5.0388e-09	C3/C4A/CFP/CLU/CP/CSF1/F10/F8/FGA/FGG/IL6/QSOX1/SERPINA1/SERPING1/VTN	15
CC	GO:0035580	specific granule lumen	8/118	62/19886	3.12932e-09	4.79829e-08	2.66267e-08	CFP/ELANE/HP/LTF/ORM1/ORM2/QSOX1/RETN	8
CC	GO:0071682	endocytic vesicle lumen	6/118	23/19886	3.56961e-09	5.03664e-08	2.79493e-08	HBA1/HBA2/HBB/HP/LTF/MPO	6
CC	GO:0070820	tertiary granule	11/118	164/19886	3.83222e-09	5.03664e-08	2.79493e-08	CFP/CR1/HBB/HP/ITGAM/ITGB2/LTF/OLR1/ORM1/PPBP/QSOX1	11
CC	GO:1905286	serine-type peptidase complex	5/118	13/19886	8.36948e-09	1.02666e-07	5.69712e-08	CFH/F3/FCN1/FCN3/THBD	5
CC	GO:1904724	tertiary granule lumen	7/118	55/19886	3.47037e-08	3.99093e-07	2.21465e-07	CFP/HBB/HP/LTF/ORM1/PPBP/QSOX1	7
CC	GO:0035578	azurophil granule lumen	8/118	91/19886	6.81897e-08	7.38053e-07	4.0956e-07	AZU1/C3/CTSG/ELANE/MPO/ORM2/RETN/SERPINA3	8
CC	GO:0005766	primary lysosome	9/118	155/19886	3.64669e-07	3.29843e-06	1.83036e-06	AZU1/C3/CTSG/ELANE/MPO/ORM2/PIGR/RETN/SERPINA3	9
CC	GO:0042582	azurophil granule	9/118	155/19886	3.64669e-07	3.29843e-06	1.83036e-06	AZU1/C3/CTSG/ELANE/MPO/ORM2/PIGR/RETN/SERPINA3	9
CC	GO:0031838	haptoglobin-hemoglobin complex	4/118	11/19886	3.76451e-07	3.29843e-06	1.83036e-06	HBA1/HBA2/HBB/HP	4
CC	GO:1905370	serine-type endopeptidase complex	4/118	11/19886	3.76451e-07	3.29843e-06	1.83036e-06	CFH/FCN1/FCN3/THBD	4
CC	GO:0034358	plasma lipoprotein particle	5/118	36/19886	2.19843e-06	1.75875e-05	9.75963e-06	APOC2/APOH/CLU/LPL/MSR1	5
CC	GO:1990777	lipoprotein particle	5/118	36/19886	2.19843e-06	1.75875e-05	9.75963e-06	APOC2/APOH/CLU/LPL/MSR1	5
CC	GO:0030667	secretory granule membrane	11/118	314/19886	2.7254e-06	2.08947e-05	1.15949e-05	AZU1/CD36/CR1/DMBT1/FCGR2A/FCGR3B/ITGAM/ITGB2/OLR1/PIGR/TLR2	11
CC	GO:0032994	protein-lipid complex	5/118	39/19886	3.31019e-06	2.4363e-05	1.35195e-05	APOC2/APOH/CLU/LPL/MSR1	5
CC	GO:0005775	vacuolar lumen	8/118	176/19886	1.02634e-05	7.26336e-05	4.03058e-05	AZU1/C3/CTSG/ELANE/MPO/ORM2/RETN/SERPINA3	8
CC	GO:0005577	fibrinogen complex	3/118	8/19886	1.1161e-05	7.60599e-05	4.22072e-05	FGA/FGG/SERPINF2	3
CC	GO:0045335	phagocytic vesicle	7/118	142/19886	2.22314e-05	0.000146092	8.10694e-05	CD36/CLEC4E/DMBT1/ELANE/LTF/MPO/TLR2	7
CC	GO:0030666	endocytic vesicle membrane	8/118	202/19886	2.77769e-05	0.00017624	9.7799e-05	CD163/CD36/CLEC4E/DMBT1/LRP2/MSR1/STAB1/TLR2	8
CC	GO:0034688	integrin alphaM-beta2 complex	2/118	2/19886	3.49136e-05	0.000214137	0.000118829	ITGAM/ITGB2	2
CC	GO:0005833	hemoglobin complex	3/118	12/19886	4.3092e-05	0.000247779	0.000137497	HBA1/HBA2/HBB	3
CC	GO:0042627	chylomicron	3/118	12/19886	4.3092e-05	0.000247779	0.000137497	APOC2/APOH/LPL	3
CC	GO:0045121	membrane raft	9/118	286/19886	5.28269e-05	0.000289541	0.000160672	CD36/CR1/ICAM1/ITGAM/ITGB2/MS4A4A/OLR1/SELE/TLR2	9
CC	GO:0098857	membrane microdomain	9/118	287/19886	5.42688e-05	0.000289541	0.000160672	CD36/CR1/ICAM1/ITGAM/ITGB2/MS4A4A/OLR1/SELE/TLR2	9
CC	GO:0044853	plasma membrane raft	6/118	112/19886	5.50757e-05	0.000289541	0.000160672	CD36/CR1/ITGAM/ITGB2/MS4A4A/SELE	6
CC	GO:0031089	platelet dense granule lumen	3/118	14/19886	7.06819e-05	0.000361263	0.000200472	APOH/CLEC3B/ITIH3	3
CC	GO:0034361	very-low-density lipoprotein particle	3/118	20/19886	0.000215686	0.00104438	0.000579545	APOC2/APOH/LPL	3
CC	GO:0034385	triglyceride-rich plasma lipoprotein particle	3/118	20/19886	0.000215686	0.00104438	0.000579545	APOC2/APOH/LPL	3
CC	GO:0042827	platelet dense granule	3/118	21/19886	0.000250547	0.00118207	0.000655953	APOH/CLEC3B/ITIH3	3
CC	GO:0016327	apicolateral plasma membrane	3/118	22/19886	0.000288855	0.00132873	0.000737339	CLDN5/OCLN/THBD	3
CC	GO:0097013	phagocytic vesicle lumen	2/118	5/19886	0.00034508	0.00154865	0.000859378	LTF/MPO	2
CC	GO:0034364	high-density lipoprotein particle	3/118	26/19886	0.000479313	0.00205101	0.00113815	APOC2/APOH/CLU	3
CC	GO:0046930	pore complex	3/118	26/19886	0.000479313	0.00205101	0.00113815	C5/C7/CD34	3
CC	GO:0001891	phagocytic cup	3/118	28/19886	0.000598737	0.00250381	0.00138941	AIF1/CLEC4E/TLR4	3
CC	GO:0005579	membrane attack complex	2/118	7/19886	0.000719052	0.00294012	0.00163153	C5/C7	2
CC	GO:1905368	peptidase complex	5/118	120/19886	0.000748	0.002992	0.00166032	CFH/F3/FCN1/FCN3/THBD	5
CC	GO:0034366	spherical high-density lipoprotein particle	2/118	8/19886	0.000955015	0.00373878	0.00207472	APOC2/CLU	2
CC	GO:1905369	endopeptidase complex	4/118	84/19886	0.0015771	0.00604556	0.0033548	CFH/FCN1/FCN3/THBD	4
CC	GO:0005581	collagen trimer	4/118	86/19886	0.00172003	0.00645889	0.00358417	C1QB/FCN1/FCN3/MSR1	4
CC	GO:0035579	specific granule membrane	4/118	91/19886	0.00211626	0.00778783	0.00432162	CD36/ITGAM/ITGB2/OLR1	4
CC	GO:0034362	low-density lipoprotein particle	2/118	12/19886	0.00221641	0.00799645	0.00443739	APOC2/MSR1	2
MF	GO:0038024	cargo receptor activity	15/116	64/18496	4.42581e-20	1.47822e-17	7.68694e-18	AGER/ASGR1/CD163/CD36/DMBT1/ITGAM/ITGB2/LRP2/LYVE1/MRC1/MSR1/OLR1/PRG4/STAB1/VTN	15
MF	GO:0005044	scavenger receptor activity	8/116	27/18496	3.76661e-12	6.29023e-10	3.271e-10	AGER/CD163/CD36/DMBT1/MSR1/PRG4/STAB1/VTN	8
MF	GO:0005539	glycosaminoglycan binding	15/116	240/18496	2.76486e-11	3.07822e-09	1.60071e-09	APOH/AZU1/CFH/CLEC3B/CTSG/ELANE/F11/LPL/LTF/LYVE1/MPO/PF4/STAB1/TLR2/VTN	15
MF	GO:0008236	serine-type peptidase activity	13/116	192/18496	2.33761e-10	1.9519e-08	1.01501e-08	ACE/AZU1/C1R/C1S/CFI/CTSG/ELANE/F10/F11/F3/HP/LTF/MMP7	13
MF	GO:0017171	serine hydrolase activity	13/116	196/18496	3.01925e-10	2.01686e-08	1.04879e-08	ACE/AZU1/C1R/C1S/CFI/CTSG/ELANE/F10/F11/F3/HP/LTF/MMP7	13
MF	GO:0004252	serine-type endopeptidase activity	12/116	174/18496	9.66722e-10	4.61265e-08	2.39863e-08	AZU1/C1R/C1S/CFI/CTSG/ELANE/F10/F11/F3/HP/LTF/MMP7	12
MF	GO:0008201	heparin binding	12/116	174/18496	9.66722e-10	4.61265e-08	2.39863e-08	APOH/AZU1/CFH/CLEC3B/CTSG/ELANE/F11/LPL/LTF/MPO/PF4/VTN	12
MF	GO:0030246	carbohydrate binding	13/116	273/18496	1.68643e-08	6.82468e-07	3.54892e-07	ASGR1/CD22/CD34/CLEC3B/CLEC4E/CLEC4M/FCN1/FCN3/MRC1/OLR1/PRG4/SELE/VTN	13
MF	GO:1901681	sulfur compound binding	13/116	275/18496	1.83898e-08	6.82468e-07	3.54892e-07	APOH/AZU1/CD34/CFH/CLEC3B/CTSG/ELANE/F11/LPL/LTF/MPO/PF4/VTN	13
MF	GO:0004175	endopeptidase activity	15/116	389/18496	2.12683e-08	7.10361e-07	3.69397e-07	ACE/AZU1/C1R/C1S/CFI/CTSG/ELANE/F10/F11/F3/HP/LTF/MMP23B/MMP28/MMP7	15
MF	GO:0001540	amyloid-beta binding	8/116	85/18496	6.03847e-08	1.73263e-06	9.00989e-07	AGER/CD36/CLU/ITGAM/ITGB2/MSR1/TLR2/TLR4	8
MF	GO:0038187	pattern recognition receptor activity	6/116	34/18496	6.22502e-08	1.73263e-06	9.00989e-07	CD36/CLEC4E/DMBT1/FCN1/TLR2/TLR4	6
MF	GO:0043177	organic acid binding	11/116	207/18496	7.45252e-08	1.91472e-06	9.95681e-07	CD22/CD36/FABP3/FCN1/HBA1/HBA2/HBB/PPARG/PTGDS/RBP2/SELE	11
MF	GO:0004866	endopeptidase inhibitor activity	10/116	168/18496	1.04134e-07	2.48434e-06	1.29189e-06	A2M/C3/C4A/C5/ITIH3/LTF/SERPINA1/SERPINA3/SERPINF2/SERPING1	10
MF	GO:0030414	peptidase inhibitor activity	10/116	175/18496	1.52693e-07	3.39996e-06	1.76802e-06	A2M/C3/C4A/C5/ITIH3/LTF/SERPINA1/SERPINA3/SERPINF2/SERPING1	10
MF	GO:0001846	opsonin binding	5/116	21/18496	1.6708e-07	3.48779e-06	1.81369e-06	C4A/CFH/CR1/ITGAM/ITGB2	5
MF	GO:0061135	endopeptidase regulator activity	10/116	184/18496	2.43693e-07	4.78785e-06	2.48974e-06	A2M/C3/C4A/C5/ITIH3/LTF/SERPINA1/SERPINA3/SERPINF2/SERPING1	10
MF	GO:0019865	immunoglobulin binding	5/116	24/18496	3.43786e-07	6.37913e-06	3.31723e-06	CD22/FCGR2A/FCGR3B/FCGRT/VWF	5
MF	GO:0001851	complement component C3b binding	4/116	11/18496	4.68515e-07	8.23601e-06	4.28283e-06	CFH/CR1/ITGAM/ITGB2	4
MF	GO:0001848	complement binding	5/116	26/18496	5.2675e-07	8.79672e-06	4.57441e-06	C4A/CFH/CR1/ITGAM/ITGB2	5
MF	GO:0060230	lipoprotein lipase activator activity	3/116	4/18496	9.57112e-07	1.52226e-05	7.91596e-06	APOC2/APOH/GPIHBP1	3
MF	GO:0071813	lipoprotein particle binding	5/116	31/18496	1.32699e-06	1.92702e-05	1.00207e-05	CD36/GPIHBP1/LPL/MSR1/STAB1	5
MF	GO:0071814	protein-lipid complex binding	5/116	31/18496	1.32699e-06	1.92702e-05	1.00207e-05	CD36/GPIHBP1/LPL/MSR1/STAB1	5
MF	GO:0061134	peptidase regulator activity	10/116	228/18496	1.73486e-06	2.41434e-05	1.25549e-05	A2M/C3/C4A/C5/ITIH3/LTF/SERPINA1/SERPINA3/SERPINF2/SERPING1	10
MF	GO:0005041	low-density lipoprotein particle receptor activity	4/116	15/18496	1.90071e-06	2.53935e-05	1.32049e-05	CD36/LRP2/OLR1/STAB1	4
MF	GO:0030228	lipoprotein particle receptor activity	4/116	18/18496	4.19942e-06	5.39463e-05	2.80528e-05	CD36/LRP2/OLR1/STAB1	4
MF	GO:0042277	peptide binding	11/116	325/18496	6.34294e-06	7.84645e-05	4.08025e-05	AGER/CD36/CLEC4M/CLU/ITGAM/ITGB2/MSR1/PPARG/SLC40A1/TLR2/TLR4	11
MF	GO:0005504	fatty acid binding	5/116	48/18496	1.22836e-05	0.000146526	7.61955e-05	CD36/FABP3/PPARG/PTGDS/RBP2	5
MF	GO:0016209	antioxidant activity	6/116	83/18496	1.36104e-05	0.000156754	8.1514e-05	GPX3/HBA1/HBA2/HBB/HP/MPO	6
MF	GO:0004601	peroxidase activity	5/116	55/18496	2.40989e-05	0.000268301	0.00013952	GPX3/HBA1/HBA2/HBB/MPO	5
MF	GO:0031720	haptoglobin binding	3/116	10/18496	2.79335e-05	0.000299743	0.00015587	HBA1/HBA2/HBB	3
MF	GO:0016684	oxidoreductase activity, acting on peroxide as acceptor	5/116	57/18496	2.87179e-05	0.000299743	0.00015587	GPX3/HBA1/HBA2/HBB/MPO	5
MF	GO:0004857	enzyme inhibitor activity	11/116	386/18496	3.14218e-05	0.000303262	0.0001577	A2M/APOC2/C3/C4A/C5/ITIH3/LTF/SERPINA1/SERPINA3/SERPINF2/SERPING1	11
MF	GO:0002020	protease binding	7/116	142/18496	3.14731e-05	0.000303262	0.0001577	A2M/CTSG/ELANE/F3/SERPINA1/SERPINF2/VWF	7
MF	GO:0031406	carboxylic acid binding	8/116	195/18496	3.17789e-05	0.000303262	0.0001577	CD22/CD36/FABP3/FCN1/PPARG/PTGDS/RBP2/SELE	8
MF	GO:0019864	IgG binding	3/116	11/18496	3.82329e-05	0.000354717	0.000184457	FCGR2A/FCGR3B/FCGRT	3
MF	GO:0004867	serine-type endopeptidase inhibitor activity	6/116	101/18496	4.17028e-05	0.000376452	0.00019576	A2M/ITIH3/SERPINA1/SERPINA3/SERPINF2/SERPING1	6
MF	GO:0033218	amide binding	11/116	405/18496	4.85898e-05	0.000427079	0.000222086	AGER/CD36/CLEC4M/CLU/ITGAM/ITGB2/MSR1/PPARG/SLC40A1/TLR2/TLR4	11
MF	GO:0005344	oxygen carrier activity	3/116	14/18496	8.31926e-05	0.00071247	0.000370493	HBA1/HBA2/HBB	3
MF	GO:0030369	ICAM-3 receptor activity	2/116	3/18496	0.000116508	0.000972844	0.000505891	CLEC4M/ITGB2	2
MF	GO:0033293	monocarboxylic acid binding	5/116	79/18496	0.000138528	0.0011285	0.000586832	CD36/FABP3/PPARG/PTGDS/RBP2	5
MF	GO:0030169	low-density lipoprotein particle binding	3/116	17/18496	0.000153295	0.00121906	0.000633925	CD36/MSR1/STAB1	3
MF	GO:0043395	heparan sulfate proteoglycan binding	3/116	18/18496	0.000183114	0.00142232	0.000739627	AZU1/CFH/LPL	3
MF	GO:0060229	lipase activator activity	3/116	19/18496	0.000216455	0.00164309	0.000854427	APOC2/APOH/GPIHBP1	3
MF	GO:0008009	chemokine activity	4/116	49/18496	0.000250302	0.0018578	0.000966079	C5/CCL2/PF4/PPBP	4
MF	GO:0020037	heme binding	6/116	141/18496	0.000263216	0.00191117	0.000993835	CYB5A/HBA1/HBA2/HBB/HMOX1/MPO	6
MF	GO:0033691	sialic acid binding	3/116	22/18496	0.000339318	0.00241132	0.00125392	CD22/FCN1/SELE	3
MF	GO:0046906	tetrapyrrole binding	6/116	151/18496	0.000380196	0.00264553	0.00137571	CYB5A/HBA1/HBA2/HBB/HMOX1/MPO	6
MF	GO:0005537	mannose binding	3/116	25/18496	0.000499875	0.00340731	0.00177184	ASGR1/CLEC4M/MRC1	3
MF	GO:0001875	lipopolysaccharide immune receptor activity	2/116	6/18496	0.000575396	0.00384364	0.00199874	TLR2/TLR4	2
MF	GO:0005201	extracellular matrix structural constituent	6/116	166/18496	0.000627819	0.0041116	0.00213808	ELN/FGA/FGG/PRG4/VTN/VWF	6
MF	GO:0005507	copper ion binding	4/116	63/18496	0.000657815	0.0042252	0.00219716	CP/F8/HAMP/S100A12	4
MF	GO:0042379	chemokine receptor binding	4/116	74/18496	0.00120526	0.00759539	0.0039497	C5/CCL2/PF4/PPBP	4
MF	GO:0030492	hemoglobin binding	2/116	9/18496	0.00136403	0.00843681	0.00438725	HBB/HP	2
MF	GO:0043394	proteoglycan binding	3/116	36/18496	0.00147587	0.00896255	0.00466064	AZU1/CFH/LPL	3
MF	GO:0001618	virus receptor activity	4/116	79/18496	0.00153653	0.00900351	0.00468194	CLEC4M/CR1/ICAM1/MRC1	4
MF	GO:0048306	calcium-dependent protein binding	4/116	79/18496	0.00153653	0.00900351	0.00468194	A2M/CLEC4M/DMBT1/S100A12	4
MF	GO:0140272	exogenous protein binding	4/116	80/18496	0.00160966	0.00926941	0.00482021	CLEC4M/CR1/ICAM1/MRC1	4
MF	GO:0005501	retinoid binding	3/116	38/18496	0.00172796	0.00961895	0.00500198	PTGDS/RBP2/RBP4	3
MF	GO:0019840	isoprenoid binding	3/116	38/18496	0.00172796	0.00961895	0.00500198	PTGDS/RBP2/RBP4	3
MF	GO:0001530	lipopolysaccharide binding	3/116	39/18496	0.00186345	0.00987927	0.00513734	LTF/TLR2/TLR4	3
MF	GO:0019825	oxygen binding	3/116	39/18496	0.00186345	0.00987927	0.00513734	HBA1/HBA2/HBB	3
MF	GO:0140318	protein transporter activity	3/116	39/18496	0.00186345	0.00987927	0.00513734	AZGP1/GPIHBP1/LRP2	3
KEGG	hsa04610	Complement and coagulation cascades	29/83	85/8041	3.10937e-38	3.79343e-36	2.84753e-36	A2M/C1QB/C1R/C1S/C3/C4A/C4BPA/C5/C7/CFH/CFI/CLU/CPB2/CR1/F10/F11/F13A1/F3/F8/FGA/FGG/ITGAM/ITGB2/SERPINA1/SERPINF2/SERPING1/THBD/VTN/VWF	29
KEGG	hsa05144	Malaria	12/83	50/8041	5.68951e-14	3.4706e-12	2.6052e-12	CCL2/CD36/CR1/HBA1/HBA2/HBB/ICAM1/IL6/ITGB2/SELE/TLR2/TLR4	12
KEGG	hsa05150	Staphylococcus aureus infection	14/83	96/8041	6.08854e-13	2.47601e-11	1.85861e-11	C1QB/C1R/C1S/C3/C4A/C5/CFH/CFI/FCGR2A/FCGR3B/FGG/ICAM1/ITGAM/ITGB2	14
KEGG	hsa05133	Pertussis	12/83	76/8041	1.17402e-11	3.58075e-10	2.68788e-10	C1QB/C1R/C1S/C3/C4A/C4BPA/C5/IL6/ITGAM/ITGB2/SERPING1/TLR4	12
KEGG	hsa04145	Phagosome	14/83	152/8041	3.51001e-10	8.56443e-09	6.42887e-09	C1R/C3/CD36/CLEC4M/FCGR2A/FCGR3B/ITGAM/ITGB2/MPO/MRC1/MSR1/OLR1/TLR2/TLR4	14
KEGG	hsa05322	Systemic lupus erythematosus	11/83	136/8041	1.23473e-07	2.51061e-06	1.88458e-06	C1QB/C1R/C1S/C3/C4A/C5/C7/CTSG/ELANE/FCGR2A/FCGR3B	11
KEGG	hsa05152	Tuberculosis	12/83	180/8041	2.66253e-07	4.64041e-06	3.48331e-06	C3/CLEC4E/CLEC4M/CR1/FCGR2A/FCGR3B/IL6/ITGAM/ITGB2/MRC1/TLR2/TLR4	12
KEGG	hsa05140	Leishmaniasis	8/83	77/8041	1.08107e-06	1.64864e-05	1.23755e-05	C3/CR1/FCGR2A/FCGR3B/ITGAM/ITGB2/TLR2/TLR4	8
KEGG	hsa05134	Legionellosis	7/83	57/8041	1.68465e-06	2.21284e-05	1.66106e-05	C3/CR1/IL6/ITGAM/ITGB2/TLR2/TLR4	7
KEGG	hsa05143	African trypanosomiasis	6/83	37/8041	1.8138e-06	2.21284e-05	1.66106e-05	HBA1/HBA2/HBB/ICAM1/IL6/SELE	6
KEGG	hsa05323	Rheumatoid arthritis	7/83	93/8041	4.47823e-05	0.000496676	0.000372829	CCL2/CSF1/ICAM1/IL6/ITGB2/TLR2/TLR4	7
KEGG	hsa04640	Hematopoietic cell lineage	7/83	99/8041	6.69582e-05	0.000670099	0.000503008	CD22/CD34/CD36/CR1/CSF1/IL6/ITGAM	7
KEGG	hsa04933	AGE-RAGE signaling pathway in diabetic complications	7/83	100/8041	7.1404e-05	0.000670099	0.000503008	AGER/CCL2/F3/ICAM1/IL6/SELE/THBD	7
KEGG	hsa05142	Chagas disease	7/83	102/8041	8.10207e-05	0.000706038	0.000529985	ACE/C1QB/C3/CCL2/IL6/TLR2/TLR4	7
KEGG	hsa03320	PPAR signaling pathway	6/83	77/8041	0.000133161	0.00102118	0.000766547	CD36/FABP3/LPL/OLR1/PLIN2/PPARG	6
KEGG	hsa04514	Cell adhesion molecules	8/83	148/8041	0.000133925	0.00102118	0.000766547	CD22/CD34/CLDN5/ICAM1/ITGAM/ITGB2/OCLN/SELE	8
KEGG	hsa04979	Cholesterol metabolism	5/83	50/8041	0.000152726	0.00109604	0.000822736	APOC2/APOH/CD36/LPL/LRP2	5
KEGG	hsa05020	Prion disease	4/83	35/8041	0.000433149	0.00293579	0.00220374	C1QB/C5/C7/IL6	4
KEGG	hsa05146	Amoebiasis	6/83	102/8041	0.000616188	0.00395658	0.00296999	CTSG/IL6/ITGAM/ITGB2/TLR2/TLR4	6
KEGG	hsa04061	Viral protein interaction with cytokine and cytokine receptor	5/83	100/8041	0.00363061	0.0221467	0.0166244	CCL2/CSF1/IL6/PF4/PPBP	5
KEGG	hsa00590	Arachidonic acid metabolism	4/83	63/8041	0.00395987	0.023005	0.0172686	GPX3/PLA2G10/PLA2G2A/PTGDS	4
KEGG	hsa04668	TNF signaling pathway	5/83	112/8041	0.0058774	0.0323596	0.0242906	CCL2/CSF1/ICAM1/IL6/SELE	5
KEGG	hsa04670	Leukocyte transendothelial migration	5/83	113/8041	0.00610058	0.0323596	0.0242906	CLDN5/ICAM1/ITGAM/ITGB2/OCLN	5
KEGG	hsa04216	Ferroptosis	3/83	41/8041	0.00852448	0.0433328	0.0325276	CP/HMOX1/SLC40A1	3
KEGG	hsa04975	Fat digestion and absorption	3/83	43/8041	0.00972432	0.0474547	0.0356217	CD36/PLA2G10/PLA2G2A	3
